# Supplementary material for: JPPRED: Prediction of Types of J-Proteins from Imbalanced Data Using an Ensemble Learning Method
Source: Biomed Res Int. 2015 Oct 26;2015:705156. doi: 10.1155/2015/705156 (PMC4637456; doi:10.1155/2015/705156)
Supplement: Supplementary file 1 — Table S1. The benchmark dataset. Table S2. The Incremental Feature Selection (IFS) result. [file 705156.f1.zip]

Archive with 3 entries (3 files):
- description.doc
- Table S1.xls
- Table S2.xlsx
