# Supplementary material for: JPPRED: Prediction of Types of J-Proteins from Imbalanced Data Using an Ensemble Learning Method
Source: Biomed Res Int. 2015 Oct 26;2015:705156. doi: 10.1155/2015/705156 (PMC4637456; doi:10.1155/2015/705156)
Supplement: Supplementary file 1 — Table S1. The benchmark dataset. Table S2. The Incremental Feature Selection (IFS) result. [file 705156.f1.zip › description.doc]

Table S1. The benchmark dataset
The benchmark dataset consists of 1199 J-protein sequences, including 63 type I J-proteins, 55 type II J-proteins, 1061 type III J-proteins and 20 type IV J-proteins. 
Table S2. The Incremental Feature Selection (IFS) result
By adding features one by one from higher to lower rank from the Symmetric Uncertainty (SU) list, 256 different feature subsets are obtained. The individual predictor is then accordingly built for each feature subset and evaluated by 10-fold cross-validation.
