# Supplementary material for: JPPRED: Prediction of Types of J-Proteins from Imbalanced Data Using an Ensemble Learning Method
Source: Biomed Res Int. 2015 Oct 26;2015:705156. doi: 10.1155/2015/705156 (PMC4637456; doi:10.1155/2015/705156)
Supplement: Supplementary file 1 — Table S1. The benchmark dataset. Table S2. The Incremental Feature Selection (IFS) result. [file 705156.f1.zip › Table S2.xlsx]

## Sheet: Sheet1
AVERAGE SENSITIVITY	AVERAGE SPECIFICITY	AVERAGE ACCURACY	AVERAGE MCC	FEATURE
0.440598	0.262418	0.207673	-0.17522	one by one-1-seqclass:1-pssm_60
0.54268	0.444412	0.410342	-0.0125587	one by one-2-seqclass:1-pssm_60,pssm_17
0.571621	0.457792	0.411176	0.00956425	one by one-3-seqclass:1-pssm_60,pssm_17,pssm_49
0.590814	0.459251	0.402836	0.0199817	one by one-4-seqclass:1-pssm_60,pssm_17,pssm_49,pssm_57
0.636452	0.497866	0.427857	0.064091	one by one-5-seqclass:1-pssm_60,pssm_17,pssm_49,pssm_57,pssm_8
0.686558	0.573286	0.520434	0.114528	one by one-6-seqclass:1-pssm_60,pssm_17,pssm_49,pssm_57,pssm_8,pssm_63
0.675892	0.581881	0.539616	0.112515	one by one-7-seqclass:1-pssm_60,pssm_17,pssm_49,pssm_57,pssm_8,pssm_63,pssm_15
0.67422	0.574077	0.529608	0.108052	one by one-8-seqclass:1-pssm_60,pssm_17,pssm_49,pssm_57,pssm_8,pssm_63,pssm_15,pssm_42
0.678208	0.609644	0.581318	0.12529	one by one-9-seqclass:1-pssm_60,pssm_17,pssm_49,pssm_57,pssm_8,pssm_63,pssm_15,pssm_42,pssm_12
0.672254	0.611224	0.581318	0.126148	one by one-10-seqclass:1-pssm_60,pssm_17,pssm_49,pssm_57,pssm_8,pssm_63,pssm_15,pssm_42,pssm_12,saac_11
0.724512	0.673562	0.653044	0.178206	one by one-11-seqclass:1-pssm_60,pssm_17,pssm_49,pssm_57,pssm_8,pssm_63,pssm_15,pssm_42,pssm_12,saac_11,pssm_9
0.707826	0.663941	0.648874	0.16499	one by one-12-seqclass:1-pssm_60,pssm_17,pssm_49,pssm_57,pssm_8,pssm_63,pssm_15,pssm_42,pssm_12,saac_11,pssm_9,pssm_50
0.695703	0.632058	0.608007	0.142517	one by one-13-seqclass:1-pssm_60,pssm_17,pssm_49,pssm_57,pssm_8,pssm_63,pssm_15,pssm_42,pssm_12,saac_11,pssm_9,pssm_50,pssm_28
0.715193	0.646236	0.618015	0.158954	one by one-14-seqclass:1-pssm_60,pssm_17,pssm_49,pssm_57,pssm_8,pssm_63,pssm_15,pssm_42,pssm_12,saac_11,pssm_9,pssm_50,pssm_28,pssm_48
0.724705	0.657666	0.634696	0.166917	one by one-15-seqclass:1-pssm_60,pssm_17,pssm_49,pssm_57,pssm_8,pssm_63,pssm_15,pssm_42,pssm_12,saac_11,pssm_9,pssm_50,pssm_28,pssm_48,pssm_52
0.737291	0.713038	0.709758	0.206957	one by one-16-seqclass:1-pssm_60,pssm_17,pssm_49,pssm_57,pssm_8,pssm_63,pssm_15,pssm_42,pssm_12,saac_11,pssm_9,pssm_50,pssm_28,pssm_48,pssm_52,pssm_18
0.761604	0.728883	0.723937	0.226753	one by one-17-seqclass:1-pssm_60,pssm_17,pssm_49,pssm_57,pssm_8,pssm_63,pssm_15,pssm_42,pssm_12,saac_11,pssm_9,pssm_50,pssm_28,pssm_48,pssm_52,pssm_18,pssm_6
0.736386	0.719254	0.719766	0.211159	one by one-18-seqclass:1-pssm_60,pssm_17,pssm_49,pssm_57,pssm_8,pssm_63,pssm_15,pssm_42,pssm_12,saac_11,pssm_9,pssm_50,pssm_28,pssm_48,pssm_52,pssm_18,pssm_6,pssm_54
0.775543	0.77609	0.786489	0.274801	one by one-19-seqclass:1-pssm_60,pssm_17,pssm_49,pssm_57,pssm_8,pssm_63,pssm_15,pssm_42,pssm_12,saac_11,pssm_9,pssm_50,pssm_28,pssm_48,pssm_52,pssm_18,pssm_6,pssm_54,pssm_41
0.77083	0.763077	0.769808	0.25991	one by one-20-seqclass:1-pssm_60,pssm_17,pssm_49,pssm_57,pssm_8,pssm_63,pssm_15,pssm_42,pssm_12,saac_11,pssm_9,pssm_50,pssm_28,pssm_48,pssm_52,pssm_18,pssm_6,pssm_54,pssm_41,pssm_34
0.791032	0.769161	0.771476	0.271243	one by one-21-seqclass:1-pssm_60,pssm_17,pssm_49,pssm_57,pssm_8,pssm_63,pssm_15,pssm_42,pssm_12,saac_11,pssm_9,pssm_50,pssm_28,pssm_48,pssm_52,pssm_18,pssm_6,pssm_54,pssm_41,pssm_34,pssm_43
0.778184	0.759832	0.765638	0.25814	one by one-22-seqclass:1-pssm_60,pssm_17,pssm_49,pssm_57,pssm_8,pssm_63,pssm_15,pssm_42,pssm_12,saac_11,pssm_9,pssm_50,pssm_28,pssm_48,pssm_52,pssm_18,pssm_6,pssm_54,pssm_41,pssm_34,pssm_43,pssm_74
0.801157	0.769383	0.765638	0.274541	one by one-23-seqclass:1-pssm_60,pssm_17,pssm_49,pssm_57,pssm_8,pssm_63,pssm_15,pssm_42,pssm_12,saac_11,pssm_9,pssm_50,pssm_28,pssm_48,pssm_52,pssm_18,pssm_6,pssm_54,pssm_41,pssm_34,pssm_43,pssm_74,pssm_5
0.776666	0.775002	0.778982	0.274473	one by one-24-seqclass:1-pssm_60,pssm_17,pssm_49,pssm_57,pssm_8,pssm_63,pssm_15,pssm_42,pssm_12,saac_11,pssm_9,pssm_50,pssm_28,pssm_48,pssm_52,pssm_18,pssm_6,pssm_54,pssm_41,pssm_34,pssm_43,pssm_74,pssm_5,pssm_81
0.80866	0.781384	0.778982	0.288888	one by one-25-seqclass:1-pssm_60,pssm_17,pssm_49,pssm_57,pssm_8,pssm_63,pssm_15,pssm_42,pssm_12,saac_11,pssm_9,pssm_50,pssm_28,pssm_48,pssm_52,pssm_18,pssm_6,pssm_54,pssm_41,pssm_34,pssm_43,pssm_74,pssm_5,pssm_81,pssm_56
0.796737	0.779135	0.778148	0.283901	one by one-26-seqclass:1-pssm_60,pssm_17,pssm_49,pssm_57,pssm_8,pssm_63,pssm_15,pssm_42,pssm_12,saac_11,pssm_9,pssm_50,pssm_28,pssm_48,pssm_52,pssm_18,pssm_6,pssm_54,pssm_41,pssm_34,pssm_43,pssm_74,pssm_5,pssm_81,pssm_56,pssm_21
0.813311	0.782328	0.778148	0.29136	one by one-27-seqclass:1-pssm_60,pssm_17,pssm_49,pssm_57,pssm_8,pssm_63,pssm_15,pssm_42,pssm_12,saac_11,pssm_9,pssm_50,pssm_28,pssm_48,pssm_52,pssm_18,pssm_6,pssm_54,pssm_41,pssm_34,pssm_43,pssm_74,pssm_5,pssm_81,pssm_56,pssm_21,saac_42
0.817856	0.784572	0.778982	0.295045	one by one-28-seqclass:1-pssm_60,pssm_17,pssm_49,pssm_57,pssm_8,pssm_63,pssm_15,pssm_42,pssm_12,saac_11,pssm_9,pssm_50,pssm_28,pssm_48,pssm_52,pssm_18,pssm_6,pssm_54,pssm_41,pssm_34,pssm_43,pssm_74,pssm_5,pssm_81,pssm_56,pssm_21,saac_42,pssm_68
0.799329	0.786292	0.787323	0.292306	one by one-29-seqclass:1-pssm_60,pssm_17,pssm_49,pssm_57,pssm_8,pssm_63,pssm_15,pssm_42,pssm_12,saac_11,pssm_9,pssm_50,pssm_28,pssm_48,pssm_52,pssm_18,pssm_6,pssm_54,pssm_41,pssm_34,pssm_43,pssm_74,pssm_5,pssm_81,pssm_56,pssm_21,saac_42,pssm_68,pssm_2
0.786122	0.78209	0.783987	0.284649	one by one-30-seqclass:1-pssm_60,pssm_17,pssm_49,pssm_57,pssm_8,pssm_63,pssm_15,pssm_42,pssm_12,saac_11,pssm_9,pssm_50,pssm_28,pssm_48,pssm_52,pssm_18,pssm_6,pssm_54,pssm_41,pssm_34,pssm_43,pssm_74,pssm_5,pssm_81,pssm_56,pssm_21,saac_42,pssm_68,pssm_2,pssm_96
0.813441	0.784279	0.780651	0.293352	one by one-31-seqclass:1-pssm_60,pssm_17,pssm_49,pssm_57,pssm_8,pssm_63,pssm_15,pssm_42,pssm_12,saac_11,pssm_9,pssm_50,pssm_28,pssm_48,pssm_52,pssm_18,pssm_6,pssm_54,pssm_41,pssm_34,pssm_43,pssm_74,pssm_5,pssm_81,pssm_56,pssm_21,saac_42,pssm_68,pssm_2,pssm_96,pssm_20
0.802566	0.783333	0.781485	0.290124	one by one-32-seqclass:1-pssm_60,pssm_17,pssm_49,pssm_57,pssm_8,pssm_63,pssm_15,pssm_42,pssm_12,saac_11,pssm_9,pssm_50,pssm_28,pssm_48,pssm_52,pssm_18,pssm_6,pssm_54,pssm_41,pssm_34,pssm_43,pssm_74,pssm_5,pssm_81,pssm_56,pssm_21,saac_42,pssm_68,pssm_2,pssm_96,pssm_20,saac_26
0.822167	0.786165	0.778982	0.297968	one by one-33-seqclass:1-pssm_60,pssm_17,pssm_49,pssm_57,pssm_8,pssm_63,pssm_15,pssm_42,pssm_12,saac_11,pssm_9,pssm_50,pssm_28,pssm_48,pssm_52,pssm_18,pssm_6,pssm_54,pssm_41,pssm_34,pssm_43,pssm_74,pssm_5,pssm_81,pssm_56,pssm_21,saac_42,pssm_68,pssm_2,pssm_96,pssm_20,saac_26,pssm_65
0.819741	0.789777	0.785655	0.301187	one by one-34-seqclass:1-pssm_60,pssm_17,pssm_49,pssm_57,pssm_8,pssm_63,pssm_15,pssm_42,pssm_12,saac_11,pssm_9,pssm_50,pssm_28,pssm_48,pssm_52,pssm_18,pssm_6,pssm_54,pssm_41,pssm_34,pssm_43,pssm_74,pssm_5,pssm_81,pssm_56,pssm_21,saac_42,pssm_68,pssm_2,pssm_96,pssm_20,saac_26,pssm_65,pssm_22
0.842876	0.802369	0.795663	0.32095	one by one-35-seqclass:1-pssm_60,pssm_17,pssm_49,pssm_57,pssm_8,pssm_63,pssm_15,pssm_42,pssm_12,saac_11,pssm_9,pssm_50,pssm_28,pssm_48,pssm_52,pssm_18,pssm_6,pssm_54,pssm_41,pssm_34,pssm_43,pssm_74,pssm_5,pssm_81,pssm_56,pssm_21,saac_42,pssm_68,pssm_2,pssm_96,pssm_20,saac_26,pssm_65,pssm_22,pssm_55
0.833488	0.785162	0.775646	0.299452	one by one-36-seqclass:1-pssm_60,pssm_17,pssm_49,pssm_57,pssm_8,pssm_63,pssm_15,pssm_42,pssm_12,saac_11,pssm_9,pssm_50,pssm_28,pssm_48,pssm_52,pssm_18,pssm_6,pssm_54,pssm_41,pssm_34,pssm_43,pssm_74,pssm_5,pssm_81,pssm_56,pssm_21,saac_42,pssm_68,pssm_2,pssm_96,pssm_20,saac_26,pssm_65,pssm_22,pssm_55,pssm_51
0.831299	0.789425	0.783153	0.303374	one by one-37-seqclass:1-pssm_60,pssm_17,pssm_49,pssm_57,pssm_8,pssm_63,pssm_15,pssm_42,pssm_12,saac_11,pssm_9,pssm_50,pssm_28,pssm_48,pssm_52,pssm_18,pssm_6,pssm_54,pssm_41,pssm_34,pssm_43,pssm_74,pssm_5,pssm_81,pssm_56,pssm_21,saac_42,pssm_68,pssm_2,pssm_96,pssm_20,saac_26,pssm_65,pssm_22,pssm_55,pssm_51,pssm_37
0.817856	0.784572	0.778982	0.295045	one by one-38-seqclass:1-pssm_60,pssm_17,pssm_49,pssm_57,pssm_8,pssm_63,pssm_15,pssm_42,pssm_12,saac_11,pssm_9,pssm_50,pssm_28,pssm_48,pssm_52,pssm_18,pssm_6,pssm_54,pssm_41,pssm_34,pssm_43,pssm_74,pssm_5,pssm_81,pssm_56,pssm_21,saac_42,pssm_68,pssm_2,pssm_96,pssm_20,saac_26,pssm_65,pssm_22,pssm_55,pssm_51,pssm_37,saac_14
0.820794	0.781034	0.77648	0.291415	one by one-39-seqclass:1-pssm_60,pssm_17,pssm_49,pssm_57,pssm_8,pssm_63,pssm_15,pssm_42,pssm_12,saac_11,pssm_9,pssm_50,pssm_28,pssm_48,pssm_52,pssm_18,pssm_6,pssm_54,pssm_41,pssm_34,pssm_43,pssm_74,pssm_5,pssm_81,pssm_56,pssm_21,saac_42,pssm_68,pssm_2,pssm_96,pssm_20,saac_26,pssm_65,pssm_22,pssm_55,pssm_51,pssm_37,saac_14,saac_43
0.831429	0.791375	0.785655	0.305438	one by one-40-seqclass:1-pssm_60,pssm_17,pssm_49,pssm_57,pssm_8,pssm_63,pssm_15,pssm_42,pssm_12,saac_11,pssm_9,pssm_50,pssm_28,pssm_48,pssm_52,pssm_18,pssm_6,pssm_54,pssm_41,pssm_34,pssm_43,pssm_74,pssm_5,pssm_81,pssm_56,pssm_21,saac_42,pssm_68,pssm_2,pssm_96,pssm_20,saac_26,pssm_65,pssm_22,pssm_55,pssm_51,pssm_37,saac_14,saac_43,pssm_7
0.819164	0.789776	0.785655	0.300916	one by one-41-seqclass:1-pssm_60,pssm_17,pssm_49,pssm_57,pssm_8,pssm_63,pssm_15,pssm_42,pssm_12,saac_11,pssm_9,pssm_50,pssm_28,pssm_48,pssm_52,pssm_18,pssm_6,pssm_54,pssm_41,pssm_34,pssm_43,pssm_74,pssm_5,pssm_81,pssm_56,pssm_21,saac_42,pssm_68,pssm_2,pssm_96,pssm_20,saac_26,pssm_65,pssm_22,pssm_55,pssm_51,pssm_37,saac_14,saac_43,pssm_7,pssm_88
0.810738	0.788468	0.783987	0.297767	one by one-42-seqclass:1-pssm_60,pssm_17,pssm_49,pssm_57,pssm_8,pssm_63,pssm_15,pssm_42,pssm_12,saac_11,pssm_9,pssm_50,pssm_28,pssm_48,pssm_52,pssm_18,pssm_6,pssm_54,pssm_41,pssm_34,pssm_43,pssm_74,pssm_5,pssm_81,pssm_56,pssm_21,saac_42,pssm_68,pssm_2,pssm_96,pssm_20,saac_26,pssm_65,pssm_22,pssm_55,pssm_51,pssm_37,saac_14,saac_43,pssm_7,pssm_88,pssm_53
0.815538	0.786884	0.783987	0.296958	one by one-43-seqclass:1-pssm_60,pssm_17,pssm_49,pssm_57,pssm_8,pssm_63,pssm_15,pssm_42,pssm_12,saac_11,pssm_9,pssm_50,pssm_28,pssm_48,pssm_52,pssm_18,pssm_6,pssm_54,pssm_41,pssm_34,pssm_43,pssm_74,pssm_5,pssm_81,pssm_56,pssm_21,saac_42,pssm_68,pssm_2,pssm_96,pssm_20,saac_26,pssm_65,pssm_22,pssm_55,pssm_51,pssm_37,saac_14,saac_43,pssm_7,pssm_88,pssm_53,saac_6
0.830629	0.796292	0.793995	0.31103	one by one-44-seqclass:1-pssm_60,pssm_17,pssm_49,pssm_57,pssm_8,pssm_63,pssm_15,pssm_42,pssm_12,saac_11,pssm_9,pssm_50,pssm_28,pssm_48,pssm_52,pssm_18,pssm_6,pssm_54,pssm_41,pssm_34,pssm_43,pssm_74,pssm_5,pssm_81,pssm_56,pssm_21,saac_42,pssm_68,pssm_2,pssm_96,pssm_20,saac_26,pssm_65,pssm_22,pssm_55,pssm_51,pssm_37,saac_14,saac_43,pssm_7,pssm_88,pssm_53,saac_6,pssm_92
0.826643	0.798527	0.794829	0.312906	one by one-45-seqclass:1-pssm_60,pssm_17,pssm_49,pssm_57,pssm_8,pssm_63,pssm_15,pssm_42,pssm_12,saac_11,pssm_9,pssm_50,pssm_28,pssm_48,pssm_52,pssm_18,pssm_6,pssm_54,pssm_41,pssm_34,pssm_43,pssm_74,pssm_5,pssm_81,pssm_56,pssm_21,saac_42,pssm_68,pssm_2,pssm_96,pssm_20,saac_26,pssm_65,pssm_22,pssm_55,pssm_51,pssm_37,saac_14,saac_43,pssm_7,pssm_88,pssm_53,saac_6,pssm_92,saac_22
0.81775	0.785872	0.780651	0.296296	one by one-46-seqclass:1-pssm_60,pssm_17,pssm_49,pssm_57,pssm_8,pssm_63,pssm_15,pssm_42,pssm_12,saac_11,pssm_9,pssm_50,pssm_28,pssm_48,pssm_52,pssm_18,pssm_6,pssm_54,pssm_41,pssm_34,pssm_43,pssm_74,pssm_5,pssm_81,pssm_56,pssm_21,saac_42,pssm_68,pssm_2,pssm_96,pssm_20,saac_26,pssm_65,pssm_22,pssm_55,pssm_51,pssm_37,saac_14,saac_43,pssm_7,pssm_88,pssm_53,saac_6,pssm_92,saac_22,pssm_29
0.819867	0.801774	0.798999	0.315381	one by one-47-seqclass:1-pssm_60,pssm_17,pssm_49,pssm_57,pssm_8,pssm_63,pssm_15,pssm_42,pssm_12,saac_11,pssm_9,pssm_50,pssm_28,pssm_48,pssm_52,pssm_18,pssm_6,pssm_54,pssm_41,pssm_34,pssm_43,pssm_74,pssm_5,pssm_81,pssm_56,pssm_21,saac_42,pssm_68,pssm_2,pssm_96,pssm_20,saac_26,pssm_65,pssm_22,pssm_55,pssm_51,pssm_37,saac_14,saac_43,pssm_7,pssm_88,pssm_53,saac_6,pssm_92,saac_22,pssm_29,pssm_27
0.812859	0.794324	0.791493	0.304832	one by one-48-seqclass:1-pssm_60,pssm_17,pssm_49,pssm_57,pssm_8,pssm_63,pssm_15,pssm_42,pssm_12,saac_11,pssm_9,pssm_50,pssm_28,pssm_48,pssm_52,pssm_18,pssm_6,pssm_54,pssm_41,pssm_34,pssm_43,pssm_74,pssm_5,pssm_81,pssm_56,pssm_21,saac_42,pssm_68,pssm_2,pssm_96,pssm_20,saac_26,pssm_65,pssm_22,pssm_55,pssm_51,pssm_37,saac_14,saac_43,pssm_7,pssm_88,pssm_53,saac_6,pssm_92,saac_22,pssm_29,pssm_27,saac_…
0.815562	0.790134	0.788157	0.300315	one by one-49-seqclass:1-pssm_60,pssm_17,pssm_49,pssm_57,pssm_8,pssm_63,pssm_15,pssm_42,pssm_12,saac_11,pssm_9,pssm_50,pssm_28,pssm_48,pssm_52,pssm_18,pssm_6,pssm_54,pssm_41,pssm_34,pssm_43,pssm_74,pssm_5,pssm_81,pssm_56,pssm_21,saac_42,pssm_68,pssm_2,pssm_96,pssm_20,saac_26,pssm_65,pssm_22,pssm_55,pssm_51,pssm_37,saac_14,saac_43,pssm_7,pssm_88,pssm_53,saac_6,pssm_92,saac_22,pssm_29,pssm_27,saac_…
0.81764	0.797218	0.793161	0.309377	one by one-50-seqclass:1-pssm_60,pssm_17,pssm_49,pssm_57,pssm_8,pssm_63,pssm_15,pssm_42,pssm_12,saac_11,pssm_9,pssm_50,pssm_28,pssm_48,pssm_52,pssm_18,pssm_6,pssm_54,pssm_41,pssm_34,pssm_43,pssm_74,pssm_5,pssm_81,pssm_56,pssm_21,saac_42,pssm_68,pssm_2,pssm_96,pssm_20,saac_26,pssm_65,pssm_22,pssm_55,pssm_51,pssm_37,saac_14,saac_43,pssm_7,pssm_88,pssm_53,saac_6,pssm_92,saac_22,pssm_29,pssm_27,saac_…
0.812555	0.803791	0.805671	0.315975	one by one-51-seqclass:1-pssm_60,pssm_17,pssm_49,pssm_57,pssm_8,pssm_63,pssm_15,pssm_42,pssm_12,saac_11,pssm_9,pssm_50,pssm_28,pssm_48,pssm_52,pssm_18,pssm_6,pssm_54,pssm_41,pssm_34,pssm_43,pssm_74,pssm_5,pssm_81,pssm_56,pssm_21,saac_42,pssm_68,pssm_2,pssm_96,pssm_20,saac_26,pssm_65,pssm_22,pssm_55,pssm_51,pssm_37,saac_14,saac_43,pssm_7,pssm_88,pssm_53,saac_6,pssm_92,saac_22,pssm_29,pssm_27,saac_…
0.812661	0.802492	0.804003	0.314554	one by one-52-seqclass:1-pssm_60,pssm_17,pssm_49,pssm_57,pssm_8,pssm_63,pssm_15,pssm_42,pssm_12,saac_11,pssm_9,pssm_50,pssm_28,pssm_48,pssm_52,pssm_18,pssm_6,pssm_54,pssm_41,pssm_34,pssm_43,pssm_74,pssm_5,pssm_81,pssm_56,pssm_21,saac_42,pssm_68,pssm_2,pssm_96,pssm_20,saac_26,pssm_65,pssm_22,pssm_55,pssm_51,pssm_37,saac_14,saac_43,pssm_7,pssm_88,pssm_53,saac_6,pssm_92,saac_22,pssm_29,pssm_27,saac_…
0.803912	0.797355	0.801501	0.306368	one by one-53-seqclass:1-pssm_60,pssm_17,pssm_49,pssm_57,pssm_8,pssm_63,pssm_15,pssm_42,pssm_12,saac_11,pssm_9,pssm_50,pssm_28,pssm_48,pssm_52,pssm_18,pssm_6,pssm_54,pssm_41,pssm_34,pssm_43,pssm_74,pssm_5,pssm_81,pssm_56,pssm_21,saac_42,pssm_68,pssm_2,pssm_96,pssm_20,saac_26,pssm_65,pssm_22,pssm_55,pssm_51,pssm_37,saac_14,saac_43,pssm_7,pssm_88,pssm_53,saac_6,pssm_92,saac_22,pssm_29,pssm_27,saac_…
0.834017	0.808579	0.805671	0.326784	one by one-54-seqclass:1-pssm_60,pssm_17,pssm_49,pssm_57,pssm_8,pssm_63,pssm_15,pssm_42,pssm_12,saac_11,pssm_9,pssm_50,pssm_28,pssm_48,pssm_52,pssm_18,pssm_6,pssm_54,pssm_41,pssm_34,pssm_43,pssm_74,pssm_5,pssm_81,pssm_56,pssm_21,saac_42,pssm_68,pssm_2,pssm_96,pssm_20,saac_26,pssm_65,pssm_22,pssm_55,pssm_51,pssm_37,saac_14,saac_43,pssm_7,pssm_88,pssm_53,saac_6,pssm_92,saac_22,pssm_29,pssm_27,saac_…
0.820102	0.802425	0.799833	0.316216	one by one-55-seqclass:1-pssm_60,pssm_17,pssm_49,pssm_57,pssm_8,pssm_63,pssm_15,pssm_42,pssm_12,saac_11,pssm_9,pssm_50,pssm_28,pssm_48,pssm_52,pssm_18,pssm_6,pssm_54,pssm_41,pssm_34,pssm_43,pssm_74,pssm_5,pssm_81,pssm_56,pssm_21,saac_42,pssm_68,pssm_2,pssm_96,pssm_20,saac_26,pssm_65,pssm_22,pssm_55,pssm_51,pssm_37,saac_14,saac_43,pssm_7,pssm_88,pssm_53,saac_6,pssm_92,saac_22,pssm_29,pssm_27,saac_…
0.814546	0.807697	0.810676	0.321509	one by one-56-seqclass:1-pssm_60,pssm_17,pssm_49,pssm_57,pssm_8,pssm_63,pssm_15,pssm_42,pssm_12,saac_11,pssm_9,pssm_50,pssm_28,pssm_48,pssm_52,pssm_18,pssm_6,pssm_54,pssm_41,pssm_34,pssm_43,pssm_74,pssm_5,pssm_81,pssm_56,pssm_21,saac_42,pssm_68,pssm_2,pssm_96,pssm_20,saac_26,pssm_65,pssm_22,pssm_55,pssm_51,pssm_37,saac_14,saac_43,pssm_7,pssm_88,pssm_53,saac_6,pssm_92,saac_22,pssm_29,pssm_27,saac_…
0.828801	0.813202	0.81568	0.331853	one by one-57-seqclass:1-pssm_60,pssm_17,pssm_49,pssm_57,pssm_8,pssm_63,pssm_15,pssm_42,pssm_12,saac_11,pssm_9,pssm_50,pssm_28,pssm_48,pssm_52,pssm_18,pssm_6,pssm_54,pssm_41,pssm_34,pssm_43,pssm_74,pssm_5,pssm_81,pssm_56,pssm_21,saac_42,pssm_68,pssm_2,pssm_96,pssm_20,saac_26,pssm_65,pssm_22,pssm_55,pssm_51,pssm_37,saac_14,saac_43,pssm_7,pssm_88,pssm_53,saac_6,pssm_92,saac_22,pssm_29,pssm_27,saac_…
0.825051	0.816088	0.817348	0.334648	one by one-58-seqclass:1-pssm_60,pssm_17,pssm_49,pssm_57,pssm_8,pssm_63,pssm_15,pssm_42,pssm_12,saac_11,pssm_9,pssm_50,pssm_28,pssm_48,pssm_52,pssm_18,pssm_6,pssm_54,pssm_41,pssm_34,pssm_43,pssm_74,pssm_5,pssm_81,pssm_56,pssm_21,saac_42,pssm_68,pssm_2,pssm_96,pssm_20,saac_26,pssm_65,pssm_22,pssm_55,pssm_51,pssm_37,saac_14,saac_43,pssm_7,pssm_88,pssm_53,saac_6,pssm_92,saac_22,pssm_29,pssm_27,saac_…
0.825051	0.816088	0.817348	0.334648	one by one-59-seqclass:1-pssm_60,pssm_17,pssm_49,pssm_57,pssm_8,pssm_63,pssm_15,pssm_42,pssm_12,saac_11,pssm_9,pssm_50,pssm_28,pssm_48,pssm_52,pssm_18,pssm_6,pssm_54,pssm_41,pssm_34,pssm_43,pssm_74,pssm_5,pssm_81,pssm_56,pssm_21,saac_42,pssm_68,pssm_2,pssm_96,pssm_20,saac_26,pssm_65,pssm_22,pssm_55,pssm_51,pssm_37,saac_14,saac_43,pssm_7,pssm_88,pssm_53,saac_6,pssm_92,saac_22,pssm_29,pssm_27,saac_…
0.834996	0.82	0.822352	0.342283	one by one-60-seqclass:1-pssm_60,pssm_17,pssm_49,pssm_57,pssm_8,pssm_63,pssm_15,pssm_42,pssm_12,saac_11,pssm_9,pssm_50,pssm_28,pssm_48,pssm_52,pssm_18,pssm_6,pssm_54,pssm_41,pssm_34,pssm_43,pssm_74,pssm_5,pssm_81,pssm_56,pssm_21,saac_42,pssm_68,pssm_2,pssm_96,pssm_20,saac_26,pssm_65,pssm_22,pssm_55,pssm_51,pssm_37,saac_14,saac_43,pssm_7,pssm_88,pssm_53,saac_6,pssm_92,saac_22,pssm_29,pssm_27,saac_…
0.829508	0.815154	0.818182	0.33462	one by one-61-seqclass:1-pssm_60,pssm_17,pssm_49,pssm_57,pssm_8,pssm_63,pssm_15,pssm_42,pssm_12,saac_11,pssm_9,pssm_50,pssm_28,pssm_48,pssm_52,pssm_18,pssm_6,pssm_54,pssm_41,pssm_34,pssm_43,pssm_74,pssm_5,pssm_81,pssm_56,pssm_21,saac_42,pssm_68,pssm_2,pssm_96,pssm_20,saac_26,pssm_65,pssm_22,pssm_55,pssm_51,pssm_37,saac_14,saac_43,pssm_7,pssm_88,pssm_53,saac_6,pssm_92,saac_22,pssm_29,pssm_27,saac_…
0.844327	0.815092	0.814012	0.33734	one by one-62-seqclass:1-pssm_60,pssm_17,pssm_49,pssm_57,pssm_8,pssm_63,pssm_15,pssm_42,pssm_12,saac_11,pssm_9,pssm_50,pssm_28,pssm_48,pssm_52,pssm_18,pssm_6,pssm_54,pssm_41,pssm_34,pssm_43,pssm_74,pssm_5,pssm_81,pssm_56,pssm_21,saac_42,pssm_68,pssm_2,pssm_96,pssm_20,saac_26,pssm_65,pssm_22,pssm_55,pssm_51,pssm_37,saac_14,saac_43,pssm_7,pssm_88,pssm_53,saac_6,pssm_92,saac_22,pssm_29,pssm_27,saac_…
0.813562	0.806322	0.804837	0.319596	one by one-63-seqclass:1-pssm_60,pssm_17,pssm_49,pssm_57,pssm_8,pssm_63,pssm_15,pssm_42,pssm_12,saac_11,pssm_9,pssm_50,pssm_28,pssm_48,pssm_52,pssm_18,pssm_6,pssm_54,pssm_41,pssm_34,pssm_43,pssm_74,pssm_5,pssm_81,pssm_56,pssm_21,saac_42,pssm_68,pssm_2,pssm_96,pssm_20,saac_26,pssm_65,pssm_22,pssm_55,pssm_51,pssm_37,saac_14,saac_43,pssm_7,pssm_88,pssm_53,saac_6,pssm_92,saac_22,pssm_29,pssm_27,saac_…
0.849344	0.818636	0.816514	0.343042	one by one-64-seqclass:1-pssm_60,pssm_17,pssm_49,pssm_57,pssm_8,pssm_63,pssm_15,pssm_42,pssm_12,saac_11,pssm_9,pssm_50,pssm_28,pssm_48,pssm_52,pssm_18,pssm_6,pssm_54,pssm_41,pssm_34,pssm_43,pssm_74,pssm_5,pssm_81,pssm_56,pssm_21,saac_42,pssm_68,pssm_2,pssm_96,pssm_20,saac_26,pssm_65,pssm_22,pssm_55,pssm_51,pssm_37,saac_14,saac_43,pssm_7,pssm_88,pssm_53,saac_6,pssm_92,saac_22,pssm_29,pssm_27,saac_…
0.844799	0.816393	0.81568	0.339171	one by one-65-seqclass:1-pssm_60,pssm_17,pssm_49,pssm_57,pssm_8,pssm_63,pssm_15,pssm_42,pssm_12,saac_11,pssm_9,pssm_50,pssm_28,pssm_48,pssm_52,pssm_18,pssm_6,pssm_54,pssm_41,pssm_34,pssm_43,pssm_74,pssm_5,pssm_81,pssm_56,pssm_21,saac_42,pssm_68,pssm_2,pssm_96,pssm_20,saac_26,pssm_65,pssm_22,pssm_55,pssm_51,pssm_37,saac_14,saac_43,pssm_7,pssm_88,pssm_53,saac_6,pssm_92,saac_22,pssm_29,pssm_27,saac_…
0.848873	0.817336	0.814846	0.341201	one by one-66-seqclass:1-pssm_60,pssm_17,pssm_49,pssm_57,pssm_8,pssm_63,pssm_15,pssm_42,pssm_12,saac_11,pssm_9,pssm_50,pssm_28,pssm_48,pssm_52,pssm_18,pssm_6,pssm_54,pssm_41,pssm_34,pssm_43,pssm_74,pssm_5,pssm_81,pssm_56,pssm_21,saac_42,pssm_68,pssm_2,pssm_96,pssm_20,saac_26,pssm_65,pssm_22,pssm_55,pssm_51,pssm_37,saac_14,saac_43,pssm_7,pssm_88,pssm_53,saac_6,pssm_92,saac_22,pssm_29,pssm_27,saac_…
0.853418	0.819579	0.81568	0.345055	one by one-67-seqclass:1-pssm_60,pssm_17,pssm_49,pssm_57,pssm_8,pssm_63,pssm_15,pssm_42,pssm_12,saac_11,pssm_9,pssm_50,pssm_28,pssm_48,pssm_52,pssm_18,pssm_6,pssm_54,pssm_41,pssm_34,pssm_43,pssm_74,pssm_5,pssm_81,pssm_56,pssm_21,saac_42,pssm_68,pssm_2,pssm_96,pssm_20,saac_26,pssm_65,pssm_22,pssm_55,pssm_51,pssm_37,saac_14,saac_43,pssm_7,pssm_88,pssm_53,saac_6,pssm_92,saac_22,pssm_29,pssm_27,saac_…
0.829744	0.815804	0.819016	0.335552	one by one-68-seqclass:1-pssm_60,pssm_17,pssm_49,pssm_57,pssm_8,pssm_63,pssm_15,pssm_42,pssm_12,saac_11,pssm_9,pssm_50,pssm_28,pssm_48,pssm_52,pssm_18,pssm_6,pssm_54,pssm_41,pssm_34,pssm_43,pssm_74,pssm_5,pssm_81,pssm_56,pssm_21,saac_42,pssm_68,pssm_2,pssm_96,pssm_20,saac_26,pssm_65,pssm_22,pssm_55,pssm_51,pssm_37,saac_14,saac_43,pssm_7,pssm_88,pssm_53,saac_6,pssm_92,saac_22,pssm_29,pssm_27,saac_…
0.847261	0.8216	0.822352	0.346956	one by one-69-seqclass:1-pssm_60,pssm_17,pssm_49,pssm_57,pssm_8,pssm_63,pssm_15,pssm_42,pssm_12,saac_11,pssm_9,pssm_50,pssm_28,pssm_48,pssm_52,pssm_18,pssm_6,pssm_54,pssm_41,pssm_34,pssm_43,pssm_74,pssm_5,pssm_81,pssm_56,pssm_21,saac_42,pssm_68,pssm_2,pssm_96,pssm_20,saac_26,pssm_65,pssm_22,pssm_55,pssm_51,pssm_37,saac_14,saac_43,pssm_7,pssm_88,pssm_53,saac_6,pssm_92,saac_22,pssm_29,pssm_27,saac_…
0.856481	0.828038	0.826522	0.357417	one by one-70-seqclass:1-pssm_60,pssm_17,pssm_49,pssm_57,pssm_8,pssm_63,pssm_15,pssm_42,pssm_12,saac_11,pssm_9,pssm_50,pssm_28,pssm_48,pssm_52,pssm_18,pssm_6,pssm_54,pssm_41,pssm_34,pssm_43,pssm_74,pssm_5,pssm_81,pssm_56,pssm_21,saac_42,pssm_68,pssm_2,pssm_96,pssm_20,saac_26,pssm_65,pssm_22,pssm_55,pssm_51,pssm_37,saac_14,saac_43,pssm_7,pssm_88,pssm_53,saac_6,pssm_92,saac_22,pssm_29,pssm_27,saac_…
0.858564	0.825074	0.820684	0.353323	one by one-71-seqclass:1-pssm_60,pssm_17,pssm_49,pssm_57,pssm_8,pssm_63,pssm_15,pssm_42,pssm_12,saac_11,pssm_9,pssm_50,pssm_28,pssm_48,pssm_52,pssm_18,pssm_6,pssm_54,pssm_41,pssm_34,pssm_43,pssm_74,pssm_5,pssm_81,pssm_56,pssm_21,saac_42,pssm_68,pssm_2,pssm_96,pssm_20,saac_26,pssm_65,pssm_22,pssm_55,pssm_51,pssm_37,saac_14,saac_43,pssm_7,pssm_88,pssm_53,saac_6,pssm_92,saac_22,pssm_29,pssm_27,saac_…
0.848637	0.816685	0.814012	0.340287	one by one-72-seqclass:1-pssm_60,pssm_17,pssm_49,pssm_57,pssm_8,pssm_63,pssm_15,pssm_42,pssm_12,saac_11,pssm_9,pssm_50,pssm_28,pssm_48,pssm_52,pssm_18,pssm_6,pssm_54,pssm_41,pssm_34,pssm_43,pssm_74,pssm_5,pssm_81,pssm_56,pssm_21,saac_42,pssm_68,pssm_2,pssm_96,pssm_20,saac_26,pssm_65,pssm_22,pssm_55,pssm_51,pssm_37,saac_14,saac_43,pssm_7,pssm_88,pssm_53,saac_6,pssm_92,saac_22,pssm_29,pssm_27,saac_…
0.828118	0.8145	0.817348	0.333096	one by one-73-seqclass:1-pssm_60,pssm_17,pssm_49,pssm_57,pssm_8,pssm_63,pssm_15,pssm_42,pssm_12,saac_11,pssm_9,pssm_50,pssm_28,pssm_48,pssm_52,pssm_18,pssm_6,pssm_54,pssm_41,pssm_34,pssm_43,pssm_74,pssm_5,pssm_81,pssm_56,pssm_21,saac_42,pssm_68,pssm_2,pssm_96,pssm_20,saac_26,pssm_65,pssm_22,pssm_55,pssm_51,pssm_37,saac_14,saac_43,pssm_7,pssm_88,pssm_53,saac_6,pssm_92,saac_22,pssm_29,pssm_27,saac_…
0.847284	0.82485	0.826522	0.351205	one by one-74-seqclass:1-pssm_60,pssm_17,pssm_49,pssm_57,pssm_8,pssm_63,pssm_15,pssm_42,pssm_12,saac_11,pssm_9,pssm_50,pssm_28,pssm_48,pssm_52,pssm_18,pssm_6,pssm_54,pssm_41,pssm_34,pssm_43,pssm_74,pssm_5,pssm_81,pssm_56,pssm_21,saac_42,pssm_68,pssm_2,pssm_96,pssm_20,saac_26,pssm_65,pssm_22,pssm_55,pssm_51,pssm_37,saac_14,saac_43,pssm_7,pssm_88,pssm_53,saac_6,pssm_92,saac_22,pssm_29,pssm_27,saac_…
0.835256	0.823901	0.827356	0.347491	one by one-75-seqclass:1-pssm_60,pssm_17,pssm_49,pssm_57,pssm_8,pssm_63,pssm_15,pssm_42,pssm_12,saac_11,pssm_9,pssm_50,pssm_28,pssm_48,pssm_52,pssm_18,pssm_6,pssm_54,pssm_41,pssm_34,pssm_43,pssm_74,pssm_5,pssm_81,pssm_56,pssm_21,saac_42,pssm_68,pssm_2,pssm_96,pssm_20,saac_26,pssm_65,pssm_22,pssm_55,pssm_51,pssm_37,saac_14,saac_43,pssm_7,pssm_88,pssm_53,saac_6,pssm_92,saac_22,pssm_29,pssm_27,saac_…
0.828695	0.814502	0.817348	0.333404	one by one-76-seqclass:1-pssm_60,pssm_17,pssm_49,pssm_57,pssm_8,pssm_63,pssm_15,pssm_42,pssm_12,saac_11,pssm_9,pssm_50,pssm_28,pssm_48,pssm_52,pssm_18,pssm_6,pssm_54,pssm_41,pssm_34,pssm_43,pssm_74,pssm_5,pssm_81,pssm_56,pssm_21,saac_42,pssm_68,pssm_2,pssm_96,pssm_20,saac_26,pssm_65,pssm_22,pssm_55,pssm_51,pssm_37,saac_14,saac_43,pssm_7,pssm_88,pssm_53,saac_6,pssm_92,saac_22,pssm_29,pssm_27,saac_…
0.831158	0.819709	0.82402	0.34124	one by one-77-seqclass:1-pssm_60,pssm_17,pssm_49,pssm_57,pssm_8,pssm_63,pssm_15,pssm_42,pssm_12,saac_11,pssm_9,pssm_50,pssm_28,pssm_48,pssm_52,pssm_18,pssm_6,pssm_54,pssm_41,pssm_34,pssm_43,pssm_74,pssm_5,pssm_81,pssm_56,pssm_21,saac_42,pssm_68,pssm_2,pssm_96,pssm_20,saac_26,pssm_65,pssm_22,pssm_55,pssm_51,pssm_37,saac_14,saac_43,pssm_7,pssm_88,pssm_53,saac_6,pssm_92,saac_22,pssm_29,pssm_27,saac_…
0.845289	0.830991	0.83236	0.359408	one by one-78-seqclass:1-pssm_60,pssm_17,pssm_49,pssm_57,pssm_8,pssm_63,pssm_15,pssm_42,pssm_12,saac_11,pssm_9,pssm_50,pssm_28,pssm_48,pssm_52,pssm_18,pssm_6,pssm_54,pssm_41,pssm_34,pssm_43,pssm_74,pssm_5,pssm_81,pssm_56,pssm_21,saac_42,pssm_68,pssm_2,pssm_96,pssm_20,saac_26,pssm_65,pssm_22,pssm_55,pssm_51,pssm_37,saac_14,saac_43,pssm_7,pssm_88,pssm_53,saac_6,pssm_92,saac_22,pssm_29,pssm_27,saac_…
0.842138	0.819354	0.821518	0.342751	one by one-79-seqclass:1-pssm_60,pssm_17,pssm_49,pssm_57,pssm_8,pssm_63,pssm_15,pssm_42,pssm_12,saac_11,pssm_9,pssm_50,pssm_28,pssm_48,pssm_52,pssm_18,pssm_6,pssm_54,pssm_41,pssm_34,pssm_43,pssm_74,pssm_5,pssm_81,pssm_56,pssm_21,saac_42,pssm_68,pssm_2,pssm_96,pssm_20,saac_26,pssm_65,pssm_22,pssm_55,pssm_51,pssm_37,saac_14,saac_43,pssm_7,pssm_88,pssm_53,saac_6,pssm_92,saac_22,pssm_29,pssm_27,saac_…
0.837916	0.820939	0.821518	0.343714	one by one-80-seqclass:1-pssm_60,pssm_17,pssm_49,pssm_57,pssm_8,pssm_63,pssm_15,pssm_42,pssm_12,saac_11,pssm_9,pssm_50,pssm_28,pssm_48,pssm_52,pssm_18,pssm_6,pssm_54,pssm_41,pssm_34,pssm_43,pssm_74,pssm_5,pssm_81,pssm_56,pssm_21,saac_42,pssm_68,pssm_2,pssm_96,pssm_20,saac_26,pssm_65,pssm_22,pssm_55,pssm_51,pssm_37,saac_14,saac_43,pssm_7,pssm_88,pssm_53,saac_6,pssm_92,saac_22,pssm_29,pssm_27,saac_…
0.869906	0.837368	0.83236	0.372655	one by one-81-seqclass:1-pssm_60,pssm_17,pssm_49,pssm_57,pssm_8,pssm_63,pssm_15,pssm_42,pssm_12,saac_11,pssm_9,pssm_50,pssm_28,pssm_48,pssm_52,pssm_18,pssm_6,pssm_54,pssm_41,pssm_34,pssm_43,pssm_74,pssm_5,pssm_81,pssm_56,pssm_21,saac_42,pssm_68,pssm_2,pssm_96,pssm_20,saac_26,pssm_65,pssm_22,pssm_55,pssm_51,pssm_37,saac_14,saac_43,pssm_7,pssm_88,pssm_53,saac_6,pssm_92,saac_22,pssm_29,pssm_27,saac_…
0.838623	0.822892	0.82402	0.346578	one by one-82-seqclass:1-pssm_60,pssm_17,pssm_49,pssm_57,pssm_8,pssm_63,pssm_15,pssm_42,pssm_12,saac_11,pssm_9,pssm_50,pssm_28,pssm_48,pssm_52,pssm_18,pssm_6,pssm_54,pssm_41,pssm_34,pssm_43,pssm_74,pssm_5,pssm_81,pssm_56,pssm_21,saac_42,pssm_68,pssm_2,pssm_96,pssm_20,saac_26,pssm_65,pssm_22,pssm_55,pssm_51,pssm_37,saac_14,saac_43,pssm_7,pssm_88,pssm_53,saac_6,pssm_92,saac_22,pssm_29,pssm_27,saac_…
0.851123	0.825142	0.824854	0.352224	one by one-83-seqclass:1-pssm_60,pssm_17,pssm_49,pssm_57,pssm_8,pssm_63,pssm_15,pssm_42,pssm_12,saac_11,pssm_9,pssm_50,pssm_28,pssm_48,pssm_52,pssm_18,pssm_6,pssm_54,pssm_41,pssm_34,pssm_43,pssm_74,pssm_5,pssm_81,pssm_56,pssm_21,saac_42,pssm_68,pssm_2,pssm_96,pssm_20,saac_26,pssm_65,pssm_22,pssm_55,pssm_51,pssm_37,saac_14,saac_43,pssm_7,pssm_88,pssm_53,saac_6,pssm_92,saac_22,pssm_29,pssm_27,saac_…
0.845072	0.825862	0.829858	0.352807	one by one-84-seqclass:1-pssm_60,pssm_17,pssm_49,pssm_57,pssm_8,pssm_63,pssm_15,pssm_42,pssm_12,saac_11,pssm_9,pssm_50,pssm_28,pssm_48,pssm_52,pssm_18,pssm_6,pssm_54,pssm_41,pssm_34,pssm_43,pssm_74,pssm_5,pssm_81,pssm_56,pssm_21,saac_42,pssm_68,pssm_2,pssm_96,pssm_20,saac_26,pssm_65,pssm_22,pssm_55,pssm_51,pssm_37,saac_14,saac_43,pssm_7,pssm_88,pssm_53,saac_6,pssm_92,saac_22,pssm_29,pssm_27,saac_…
0.848551	0.831281	0.830692	0.360043	one by one-85-seqclass:1-pssm_60,pssm_17,pssm_49,pssm_57,pssm_8,pssm_63,pssm_15,pssm_42,pssm_12,saac_11,pssm_9,pssm_50,pssm_28,pssm_48,pssm_52,pssm_18,pssm_6,pssm_54,pssm_41,pssm_34,pssm_43,pssm_74,pssm_5,pssm_81,pssm_56,pssm_21,saac_42,pssm_68,pssm_2,pssm_96,pssm_20,saac_26,pssm_65,pssm_22,pssm_55,pssm_51,pssm_37,saac_14,saac_43,pssm_7,pssm_88,pssm_53,saac_6,pssm_92,saac_22,pssm_29,pssm_27,saac_…
0.852666	0.830996	0.83236	0.36084	one by one-86-seqclass:1-pssm_60,pssm_17,pssm_49,pssm_57,pssm_8,pssm_63,pssm_15,pssm_42,pssm_12,saac_11,pssm_9,pssm_50,pssm_28,pssm_48,pssm_52,pssm_18,pssm_6,pssm_54,pssm_41,pssm_34,pssm_43,pssm_74,pssm_5,pssm_81,pssm_56,pssm_21,saac_42,pssm_68,pssm_2,pssm_96,pssm_20,saac_26,pssm_65,pssm_22,pssm_55,pssm_51,pssm_37,saac_14,saac_43,pssm_7,pssm_88,pssm_53,saac_6,pssm_92,saac_22,pssm_29,pssm_27,saac_…
0.84473	0.826512	0.830692	0.353505	one by one-87-seqclass:1-pssm_60,pssm_17,pssm_49,pssm_57,pssm_8,pssm_63,pssm_15,pssm_42,pssm_12,saac_11,pssm_9,pssm_50,pssm_28,pssm_48,pssm_52,pssm_18,pssm_6,pssm_54,pssm_41,pssm_34,pssm_43,pssm_74,pssm_5,pssm_81,pssm_56,pssm_21,saac_42,pssm_68,pssm_2,pssm_96,pssm_20,saac_26,pssm_65,pssm_22,pssm_55,pssm_51,pssm_37,saac_14,saac_43,pssm_7,pssm_88,pssm_53,saac_6,pssm_92,saac_22,pssm_29,pssm_27,saac_…
0.854422	0.83425	0.83653	0.366315	one by one-88-seqclass:1-pssm_60,pssm_17,pssm_49,pssm_57,pssm_8,pssm_63,pssm_15,pssm_42,pssm_12,saac_11,pssm_9,pssm_50,pssm_28,pssm_48,pssm_52,pssm_18,pssm_6,pssm_54,pssm_41,pssm_34,pssm_43,pssm_74,pssm_5,pssm_81,pssm_56,pssm_21,saac_42,pssm_68,pssm_2,pssm_96,pssm_20,saac_26,pssm_65,pssm_22,pssm_55,pssm_51,pssm_37,saac_14,saac_43,pssm_7,pssm_88,pssm_53,saac_6,pssm_92,saac_22,pssm_29,pssm_27,saac_…
0.840184	0.824268	0.829858	0.349513	one by one-89-seqclass:1-pssm_60,pssm_17,pssm_49,pssm_57,pssm_8,pssm_63,pssm_15,pssm_42,pssm_12,saac_11,pssm_9,pssm_50,pssm_28,pssm_48,pssm_52,pssm_18,pssm_6,pssm_54,pssm_41,pssm_34,pssm_43,pssm_74,pssm_5,pssm_81,pssm_56,pssm_21,saac_42,pssm_68,pssm_2,pssm_96,pssm_20,saac_26,pssm_65,pssm_22,pssm_55,pssm_51,pssm_37,saac_14,saac_43,pssm_7,pssm_88,pssm_53,saac_6,pssm_92,saac_22,pssm_29,pssm_27,saac_…
0.850006	0.833957	0.838198	0.365089	one by one-90-seqclass:1-pssm_60,pssm_17,pssm_49,pssm_57,pssm_8,pssm_63,pssm_15,pssm_42,pssm_12,saac_11,pssm_9,pssm_50,pssm_28,pssm_48,pssm_52,pssm_18,pssm_6,pssm_54,pssm_41,pssm_34,pssm_43,pssm_74,pssm_5,pssm_81,pssm_56,pssm_21,saac_42,pssm_68,pssm_2,pssm_96,pssm_20,saac_26,pssm_65,pssm_22,pssm_55,pssm_51,pssm_37,saac_14,saac_43,pssm_7,pssm_88,pssm_53,saac_6,pssm_92,saac_22,pssm_29,pssm_27,saac_…
0.847086	0.833018	0.839033	0.363835	one by one-91-seqclass:1-pssm_60,pssm_17,pssm_49,pssm_57,pssm_8,pssm_63,pssm_15,pssm_42,pssm_12,saac_11,pssm_9,pssm_50,pssm_28,pssm_48,pssm_52,pssm_18,pssm_6,pssm_54,pssm_41,pssm_34,pssm_43,pssm_74,pssm_5,pssm_81,pssm_56,pssm_21,saac_42,pssm_68,pssm_2,pssm_96,pssm_20,saac_26,pssm_65,pssm_22,pssm_55,pssm_51,pssm_37,saac_14,saac_43,pssm_7,pssm_88,pssm_53,saac_6,pssm_92,saac_22,pssm_29,pssm_27,saac_…
0.842541	0.830775	0.838198	0.359779	one by one-92-seqclass:1-pssm_60,pssm_17,pssm_49,pssm_57,pssm_8,pssm_63,pssm_15,pssm_42,pssm_12,saac_11,pssm_9,pssm_50,pssm_28,pssm_48,pssm_52,pssm_18,pssm_6,pssm_54,pssm_41,pssm_34,pssm_43,pssm_74,pssm_5,pssm_81,pssm_56,pssm_21,saac_42,pssm_68,pssm_2,pssm_96,pssm_20,saac_26,pssm_65,pssm_22,pssm_55,pssm_51,pssm_37,saac_14,saac_43,pssm_7,pssm_88,pssm_53,saac_6,pssm_92,saac_22,pssm_29,pssm_27,saac_…
0.855023	0.837502	0.840701	0.371272	one by one-93-seqclass:1-pssm_60,pssm_17,pssm_49,pssm_57,pssm_8,pssm_63,pssm_15,pssm_42,pssm_12,saac_11,pssm_9,pssm_50,pssm_28,pssm_48,pssm_52,pssm_18,pssm_6,pssm_54,pssm_41,pssm_34,pssm_43,pssm_74,pssm_5,pssm_81,pssm_56,pssm_21,saac_42,pssm_68,pssm_2,pssm_96,pssm_20,saac_26,pssm_65,pssm_22,pssm_55,pssm_51,pssm_37,saac_14,saac_43,pssm_7,pssm_88,pssm_53,saac_6,pssm_92,saac_22,pssm_29,pssm_27,saac_…
0.847192	0.831719	0.837364	0.362038	one by one-94-seqclass:1-pssm_60,pssm_17,pssm_49,pssm_57,pssm_8,pssm_63,pssm_15,pssm_42,pssm_12,saac_11,pssm_9,pssm_50,pssm_28,pssm_48,pssm_52,pssm_18,pssm_6,pssm_54,pssm_41,pssm_34,pssm_43,pssm_74,pssm_5,pssm_81,pssm_56,pssm_21,saac_42,pssm_68,pssm_2,pssm_96,pssm_20,saac_26,pssm_65,pssm_22,pssm_55,pssm_51,pssm_37,saac_14,saac_43,pssm_7,pssm_88,pssm_53,saac_6,pssm_92,saac_22,pssm_29,pssm_27,saac_…
0.838896	0.832361	0.838198	0.36101	one by one-95-seqclass:1-pssm_60,pssm_17,pssm_49,pssm_57,pssm_8,pssm_63,pssm_15,pssm_42,pssm_12,saac_11,pssm_9,pssm_50,pssm_28,pssm_48,pssm_52,pssm_18,pssm_6,pssm_54,pssm_41,pssm_34,pssm_43,pssm_74,pssm_5,pssm_81,pssm_56,pssm_21,saac_42,pssm_68,pssm_2,pssm_96,pssm_20,saac_26,pssm_65,pssm_22,pssm_55,pssm_51,pssm_37,saac_14,saac_43,pssm_7,pssm_88,pssm_53,saac_6,pssm_92,saac_22,pssm_29,pssm_27,saac_…
0.844754	0.829762	0.834862	0.357914	one by one-96-seqclass:1-pssm_60,pssm_17,pssm_49,pssm_57,pssm_8,pssm_63,pssm_15,pssm_42,pssm_12,saac_11,pssm_9,pssm_50,pssm_28,pssm_48,pssm_52,pssm_18,pssm_6,pssm_54,pssm_41,pssm_34,pssm_43,pssm_74,pssm_5,pssm_81,pssm_56,pssm_21,saac_42,pssm_68,pssm_2,pssm_96,pssm_20,saac_26,pssm_65,pssm_22,pssm_55,pssm_51,pssm_37,saac_14,saac_43,pssm_7,pssm_88,pssm_53,saac_6,pssm_92,saac_22,pssm_29,pssm_27,saac_…
0.858967	0.836494	0.837364	0.370329	one by one-97-seqclass:1-pssm_60,pssm_17,pssm_49,pssm_57,pssm_8,pssm_63,pssm_15,pssm_42,pssm_12,saac_11,pssm_9,pssm_50,pssm_28,pssm_48,pssm_52,pssm_18,pssm_6,pssm_54,pssm_41,pssm_34,pssm_43,pssm_74,pssm_5,pssm_81,pssm_56,pssm_21,saac_42,pssm_68,pssm_2,pssm_96,pssm_20,saac_26,pssm_65,pssm_22,pssm_55,pssm_51,pssm_37,saac_14,saac_43,pssm_7,pssm_88,pssm_53,saac_6,pssm_92,saac_22,pssm_29,pssm_27,saac_…
0.851526	0.836561	0.841535	0.369701	one by one-98-seqclass:1-pssm_60,pssm_17,pssm_49,pssm_57,pssm_8,pssm_63,pssm_15,pssm_42,pssm_12,saac_11,pssm_9,pssm_50,pssm_28,pssm_48,pssm_52,pssm_18,pssm_6,pssm_54,pssm_41,pssm_34,pssm_43,pssm_74,pssm_5,pssm_81,pssm_56,pssm_21,saac_42,pssm_68,pssm_2,pssm_96,pssm_20,saac_26,pssm_65,pssm_22,pssm_55,pssm_51,pssm_37,saac_14,saac_43,pssm_7,pssm_88,pssm_53,saac_6,pssm_92,saac_22,pssm_29,pssm_27,saac_…
0.853609	0.833598	0.835696	0.364945	one by one-99-seqclass:1-pssm_60,pssm_17,pssm_49,pssm_57,pssm_8,pssm_63,pssm_15,pssm_42,pssm_12,saac_11,pssm_9,pssm_50,pssm_28,pssm_48,pssm_52,pssm_18,pssm_6,pssm_54,pssm_41,pssm_34,pssm_43,pssm_74,pssm_5,pssm_81,pssm_56,pssm_21,saac_42,pssm_68,pssm_2,pssm_96,pssm_20,saac_26,pssm_65,pssm_22,pssm_55,pssm_51,pssm_37,saac_14,saac_43,pssm_7,pssm_88,pssm_53,saac_6,pssm_92,saac_22,pssm_29,pssm_27,saac_…
0.859568	0.839746	0.841535	0.375329	one by one-100-seqclass:1-pssm_60,pssm_17,pssm_49,pssm_57,pssm_8,pssm_63,pssm_15,pssm_42,pssm_12,saac_11,pssm_9,pssm_50,pssm_28,pssm_48,pssm_52,pssm_18,pssm_6,pssm_54,pssm_41,pssm_34,pssm_43,pssm_74,pssm_5,pssm_81,pssm_56,pssm_21,saac_42,pssm_68,pssm_2,pssm_96,pssm_20,saac_26,pssm_65,pssm_22,pssm_55,pssm_51,pssm_37,saac_14,saac_43,pssm_7,pssm_88,pssm_53,saac_6,pssm_92,saac_22,pssm_29,pssm_27,saac…
0.850948	0.83656	0.841535	0.36935	one by one-101-seqclass:1-pssm_60,pssm_17,pssm_49,pssm_57,pssm_8,pssm_63,pssm_15,pssm_42,pssm_12,saac_11,pssm_9,pssm_50,pssm_28,pssm_48,pssm_52,pssm_18,pssm_6,pssm_54,pssm_41,pssm_34,pssm_43,pssm_74,pssm_5,pssm_81,pssm_56,pssm_21,saac_42,pssm_68,pssm_2,pssm_96,pssm_20,saac_26,pssm_65,pssm_22,pssm_55,pssm_51,pssm_37,saac_14,saac_43,pssm_7,pssm_88,pssm_53,saac_6,pssm_92,saac_22,pssm_29,pssm_27,saac…
0.833773	0.830116	0.837364	0.356641	one by one-102-seqclass:1-pssm_60,pssm_17,pssm_49,pssm_57,pssm_8,pssm_63,pssm_15,pssm_42,pssm_12,saac_11,pssm_9,pssm_50,pssm_28,pssm_48,pssm_52,pssm_18,pssm_6,pssm_54,pssm_41,pssm_34,pssm_43,pssm_74,pssm_5,pssm_81,pssm_56,pssm_21,saac_42,pssm_68,pssm_2,pssm_96,pssm_20,saac_26,pssm_65,pssm_22,pssm_55,pssm_51,pssm_37,saac_14,saac_43,pssm_7,pssm_88,pssm_53,saac_6,pssm_92,saac_22,pssm_29,pssm_27,saac…
0.85408	0.8349	0.837364	0.367031	one by one-103-seqclass:1-pssm_60,pssm_17,pssm_49,pssm_57,pssm_8,pssm_63,pssm_15,pssm_42,pssm_12,saac_11,pssm_9,pssm_50,pssm_28,pssm_48,pssm_52,pssm_18,pssm_6,pssm_54,pssm_41,pssm_34,pssm_43,pssm_74,pssm_5,pssm_81,pssm_56,pssm_21,saac_42,pssm_68,pssm_2,pssm_96,pssm_20,saac_26,pssm_65,pssm_22,pssm_55,pssm_51,pssm_37,saac_14,saac_43,pssm_7,pssm_88,pssm_53,saac_6,pssm_92,saac_22,pssm_29,pssm_27,saac…
0.854787	0.836852	0.839867	0.370203	one by one-104-seqclass:1-pssm_60,pssm_17,pssm_49,pssm_57,pssm_8,pssm_63,pssm_15,pssm_42,pssm_12,saac_11,pssm_9,pssm_50,pssm_28,pssm_48,pssm_52,pssm_18,pssm_6,pssm_54,pssm_41,pssm_34,pssm_43,pssm_74,pssm_5,pssm_81,pssm_56,pssm_21,saac_42,pssm_68,pssm_2,pssm_96,pssm_20,saac_26,pssm_65,pssm_22,pssm_55,pssm_51,pssm_37,saac_14,saac_43,pssm_7,pssm_88,pssm_53,saac_6,pssm_92,saac_22,pssm_29,pssm_27,saac…
0.850006	0.833957	0.838198	0.365089	one by one-105-seqclass:1-pssm_60,pssm_17,pssm_49,pssm_57,pssm_8,pssm_63,pssm_15,pssm_42,pssm_12,saac_11,pssm_9,pssm_50,pssm_28,pssm_48,pssm_52,pssm_18,pssm_6,pssm_54,pssm_41,pssm_34,pssm_43,pssm_74,pssm_5,pssm_81,pssm_56,pssm_21,saac_42,pssm_68,pssm_2,pssm_96,pssm_20,saac_26,pssm_65,pssm_22,pssm_55,pssm_51,pssm_37,saac_14,saac_43,pssm_7,pssm_88,pssm_53,saac_6,pssm_92,saac_22,pssm_29,pssm_27,saac…
0.859097	0.838445	0.839867	0.373184	one by one-106-seqclass:1-pssm_60,pssm_17,pssm_49,pssm_57,pssm_8,pssm_63,pssm_15,pssm_42,pssm_12,saac_11,pssm_9,pssm_50,pssm_28,pssm_48,pssm_52,pssm_18,pssm_6,pssm_54,pssm_41,pssm_34,pssm_43,pssm_74,pssm_5,pssm_81,pssm_56,pssm_21,saac_42,pssm_68,pssm_2,pssm_96,pssm_20,saac_26,pssm_65,pssm_22,pssm_55,pssm_51,pssm_37,saac_14,saac_43,pssm_7,pssm_88,pssm_53,saac_6,pssm_92,saac_22,pssm_29,pssm_27,saac…
0.854422	0.83425	0.83653	0.366315	one by one-107-seqclass:1-pssm_60,pssm_17,pssm_49,pssm_57,pssm_8,pssm_63,pssm_15,pssm_42,pssm_12,saac_11,pssm_9,pssm_50,pssm_28,pssm_48,pssm_52,pssm_18,pssm_6,pssm_54,pssm_41,pssm_34,pssm_43,pssm_74,pssm_5,pssm_81,pssm_56,pssm_21,saac_42,pssm_68,pssm_2,pssm_96,pssm_20,saac_26,pssm_65,pssm_22,pssm_55,pssm_51,pssm_37,saac_14,saac_43,pssm_7,pssm_88,pssm_53,saac_6,pssm_92,saac_22,pssm_29,pssm_27,saac…
0.849876	0.832007	0.835696	0.362295	one by one-108-seqclass:1-pssm_60,pssm_17,pssm_49,pssm_57,pssm_8,pssm_63,pssm_15,pssm_42,pssm_12,saac_11,pssm_9,pssm_50,pssm_28,pssm_48,pssm_52,pssm_18,pssm_6,pssm_54,pssm_41,pssm_34,pssm_43,pssm_74,pssm_5,pssm_81,pssm_56,pssm_21,saac_42,pssm_68,pssm_2,pssm_96,pssm_20,saac_26,pssm_65,pssm_22,pssm_55,pssm_51,pssm_37,saac_14,saac_43,pssm_7,pssm_88,pssm_53,saac_6,pssm_92,saac_22,pssm_29,pssm_27,saac…
0.843465	0.837855	0.843203	0.369742	one by one-109-seqclass:1-pssm_60,pssm_17,pssm_49,pssm_57,pssm_8,pssm_63,pssm_15,pssm_42,pssm_12,saac_11,pssm_9,pssm_50,pssm_28,pssm_48,pssm_52,pssm_18,pssm_6,pssm_54,pssm_41,pssm_34,pssm_43,pssm_74,pssm_5,pssm_81,pssm_56,pssm_21,saac_42,pssm_68,pssm_2,pssm_96,pssm_20,saac_26,pssm_65,pssm_22,pssm_55,pssm_51,pssm_37,saac_14,saac_43,pssm_7,pssm_88,pssm_53,saac_6,pssm_92,saac_22,pssm_29,pssm_27,saac…
0.850006	0.833957	0.838198	0.365089	one by one-110-seqclass:1-pssm_60,pssm_17,pssm_49,pssm_57,pssm_8,pssm_63,pssm_15,pssm_42,pssm_12,saac_11,pssm_9,pssm_50,pssm_28,pssm_48,pssm_52,pssm_18,pssm_6,pssm_54,pssm_41,pssm_34,pssm_43,pssm_74,pssm_5,pssm_81,pssm_56,pssm_21,saac_42,pssm_68,pssm_2,pssm_96,pssm_20,saac_26,pssm_65,pssm_22,pssm_55,pssm_51,pssm_37,saac_14,saac_43,pssm_7,pssm_88,pssm_53,saac_6,pssm_92,saac_22,pssm_29,pssm_27,saac…
0.855965	0.840105	0.844037	0.375609	one by one-111-seqclass:1-pssm_60,pssm_17,pssm_49,pssm_57,pssm_8,pssm_63,pssm_15,pssm_42,pssm_12,saac_11,pssm_9,pssm_50,pssm_28,pssm_48,pssm_52,pssm_18,pssm_6,pssm_54,pssm_41,pssm_34,pssm_43,pssm_74,pssm_5,pssm_81,pssm_56,pssm_21,saac_42,pssm_68,pssm_2,pssm_96,pssm_20,saac_26,pssm_65,pssm_22,pssm_55,pssm_51,pssm_37,saac_14,saac_43,pssm_7,pssm_88,pssm_53,saac_6,pssm_92,saac_22,pssm_29,pssm_27,saac…
0.85573	0.839454	0.843203	0.374515	one by one-112-seqclass:1-pssm_60,pssm_17,pssm_49,pssm_57,pssm_8,pssm_63,pssm_15,pssm_42,pssm_12,saac_11,pssm_9,pssm_50,pssm_28,pssm_48,pssm_52,pssm_18,pssm_6,pssm_54,pssm_41,pssm_34,pssm_43,pssm_74,pssm_5,pssm_81,pssm_56,pssm_21,saac_42,pssm_68,pssm_2,pssm_96,pssm_20,saac_26,pssm_65,pssm_22,pssm_55,pssm_51,pssm_37,saac_14,saac_43,pssm_7,pssm_88,pssm_53,saac_6,pssm_92,saac_22,pssm_29,pssm_27,saac…
0.852339	0.837214	0.842369	0.371114	one by one-113-seqclass:1-pssm_60,pssm_17,pssm_49,pssm_57,pssm_8,pssm_63,pssm_15,pssm_42,pssm_12,saac_11,pssm_9,pssm_50,pssm_28,pssm_48,pssm_52,pssm_18,pssm_6,pssm_54,pssm_41,pssm_34,pssm_43,pssm_74,pssm_5,pssm_81,pssm_56,pssm_21,saac_42,pssm_68,pssm_2,pssm_96,pssm_20,saac_26,pssm_65,pssm_22,pssm_55,pssm_51,pssm_37,saac_14,saac_43,pssm_7,pssm_88,pssm_53,saac_6,pssm_92,saac_22,pssm_29,pssm_27,saac…
0.842287	0.834601	0.839033	0.364388	one by one-114-seqclass:1-pssm_60,pssm_17,pssm_49,pssm_57,pssm_8,pssm_63,pssm_15,pssm_42,pssm_12,saac_11,pssm_9,pssm_50,pssm_28,pssm_48,pssm_52,pssm_18,pssm_6,pssm_54,pssm_41,pssm_34,pssm_43,pssm_74,pssm_5,pssm_81,pssm_56,pssm_21,saac_42,pssm_68,pssm_2,pssm_96,pssm_20,saac_26,pssm_65,pssm_22,pssm_55,pssm_51,pssm_37,saac_14,saac_43,pssm_7,pssm_88,pssm_53,saac_6,pssm_92,saac_22,pssm_29,pssm_27,saac…
0.847451	0.835619	0.842369	0.367784	one by one-115-seqclass:1-pssm_60,pssm_17,pssm_49,pssm_57,pssm_8,pssm_63,pssm_15,pssm_42,pssm_12,saac_11,pssm_9,pssm_50,pssm_28,pssm_48,pssm_52,pssm_18,pssm_6,pssm_54,pssm_41,pssm_34,pssm_43,pssm_74,pssm_5,pssm_81,pssm_56,pssm_21,saac_42,pssm_68,pssm_2,pssm_96,pssm_20,saac_26,pssm_65,pssm_22,pssm_55,pssm_51,pssm_37,saac_14,saac_43,pssm_7,pssm_88,pssm_53,saac_6,pssm_92,saac_22,pssm_29,pssm_27,saac…
0.850477	0.835259	0.839867	0.367207	one by one-116-seqclass:1-pssm_60,pssm_17,pssm_49,pssm_57,pssm_8,pssm_63,pssm_15,pssm_42,pssm_12,saac_11,pssm_9,pssm_50,pssm_28,pssm_48,pssm_52,pssm_18,pssm_6,pssm_54,pssm_41,pssm_34,pssm_43,pssm_74,pssm_5,pssm_81,pssm_56,pssm_21,saac_42,pssm_68,pssm_2,pssm_96,pssm_20,saac_26,pssm_65,pssm_22,pssm_55,pssm_51,pssm_37,saac_14,saac_43,pssm_7,pssm_88,pssm_53,saac_6,pssm_92,saac_22,pssm_29,pssm_27,saac…
0.860746	0.842999	0.845705	0.380799	one by one-117-seqclass:1-pssm_60,pssm_17,pssm_49,pssm_57,pssm_8,pssm_63,pssm_15,pssm_42,pssm_12,saac_11,pssm_9,pssm_50,pssm_28,pssm_48,pssm_52,pssm_18,pssm_6,pssm_54,pssm_41,pssm_34,pssm_43,pssm_74,pssm_5,pssm_81,pssm_56,pssm_21,saac_42,pssm_68,pssm_2,pssm_96,pssm_20,saac_26,pssm_65,pssm_22,pssm_55,pssm_51,pssm_37,saac_14,saac_43,pssm_7,pssm_88,pssm_53,saac_6,pssm_92,saac_22,pssm_29,pssm_27,saac…
0.854551	0.836201	0.839033	0.36914	one by one-118-seqclass:1-pssm_60,pssm_17,pssm_49,pssm_57,pssm_8,pssm_63,pssm_15,pssm_42,pssm_12,saac_11,pssm_9,pssm_50,pssm_28,pssm_48,pssm_52,pssm_18,pssm_6,pssm_54,pssm_41,pssm_34,pssm_43,pssm_74,pssm_5,pssm_81,pssm_56,pssm_21,saac_42,pssm_68,pssm_2,pssm_96,pssm_20,saac_26,pssm_65,pssm_22,pssm_55,pssm_51,pssm_37,saac_14,saac_43,pssm_7,pssm_88,pssm_53,saac_6,pssm_92,saac_22,pssm_29,pssm_27,saac…
0.846509	0.833016	0.839033	0.363496	one by one-119-seqclass:1-pssm_60,pssm_17,pssm_49,pssm_57,pssm_8,pssm_63,pssm_15,pssm_42,pssm_12,saac_11,pssm_9,pssm_50,pssm_28,pssm_48,pssm_52,pssm_18,pssm_6,pssm_54,pssm_41,pssm_34,pssm_43,pssm_74,pssm_5,pssm_81,pssm_56,pssm_21,saac_42,pssm_68,pssm_2,pssm_96,pssm_20,saac_26,pssm_65,pssm_22,pssm_55,pssm_51,pssm_37,saac_14,saac_43,pssm_7,pssm_88,pssm_53,saac_6,pssm_92,saac_22,pssm_29,pssm_27,saac…
0.851849	0.84039	0.842369	0.374613	one by one-120-seqclass:1-pssm_60,pssm_17,pssm_49,pssm_57,pssm_8,pssm_63,pssm_15,pssm_42,pssm_12,saac_11,pssm_9,pssm_50,pssm_28,pssm_48,pssm_52,pssm_18,pssm_6,pssm_54,pssm_41,pssm_34,pssm_43,pssm_74,pssm_5,pssm_81,pssm_56,pssm_21,saac_42,pssm_68,pssm_2,pssm_96,pssm_20,saac_26,pssm_65,pssm_22,pssm_55,pssm_51,pssm_37,saac_14,saac_43,pssm_7,pssm_88,pssm_53,saac_6,pssm_92,saac_22,pssm_29,pssm_27,saac…
0.859804	0.840397	0.842369	0.376411	one by one-121-seqclass:1-pssm_60,pssm_17,pssm_49,pssm_57,pssm_8,pssm_63,pssm_15,pssm_42,pssm_12,saac_11,pssm_9,pssm_50,pssm_28,pssm_48,pssm_52,pssm_18,pssm_6,pssm_54,pssm_41,pssm_34,pssm_43,pssm_74,pssm_5,pssm_81,pssm_56,pssm_21,saac_42,pssm_68,pssm_2,pssm_96,pssm_20,saac_26,pssm_65,pssm_22,pssm_55,pssm_51,pssm_37,saac_14,saac_43,pssm_7,pssm_88,pssm_53,saac_6,pssm_92,saac_22,pssm_29,pssm_27,saac…
0.846126	0.834893	0.837364	0.365268	one by one-122-seqclass:1-pssm_60,pssm_17,pssm_49,pssm_57,pssm_8,pssm_63,pssm_15,pssm_42,pssm_12,saac_11,pssm_9,pssm_50,pssm_28,pssm_48,pssm_52,pssm_18,pssm_6,pssm_54,pssm_41,pssm_34,pssm_43,pssm_74,pssm_5,pssm_81,pssm_56,pssm_21,saac_42,pssm_68,pssm_2,pssm_96,pssm_20,saac_26,pssm_65,pssm_22,pssm_55,pssm_51,pssm_37,saac_14,saac_43,pssm_7,pssm_88,pssm_53,saac_6,pssm_92,saac_22,pssm_29,pssm_27,saac…
0.863171	0.839387	0.839033	0.375085	one by one-123-seqclass:1-pssm_60,pssm_17,pssm_49,pssm_57,pssm_8,pssm_63,pssm_15,pssm_42,pssm_12,saac_11,pssm_9,pssm_50,pssm_28,pssm_48,pssm_52,pssm_18,pssm_6,pssm_54,pssm_41,pssm_34,pssm_43,pssm_74,pssm_5,pssm_81,pssm_56,pssm_21,saac_42,pssm_68,pssm_2,pssm_96,pssm_20,saac_26,pssm_65,pssm_22,pssm_55,pssm_51,pssm_37,saac_14,saac_43,pssm_7,pssm_88,pssm_53,saac_6,pssm_92,saac_22,pssm_29,pssm_27,saac…
0.864114	0.84199	0.842369	0.379378	one by one-124-seqclass:1-pssm_60,pssm_17,pssm_49,pssm_57,pssm_8,pssm_63,pssm_15,pssm_42,pssm_12,saac_11,pssm_9,pssm_50,pssm_28,pssm_48,pssm_52,pssm_18,pssm_6,pssm_54,pssm_41,pssm_34,pssm_43,pssm_74,pssm_5,pssm_81,pssm_56,pssm_21,saac_42,pssm_68,pssm_2,pssm_96,pssm_20,saac_26,pssm_65,pssm_22,pssm_55,pssm_51,pssm_37,saac_14,saac_43,pssm_7,pssm_88,pssm_53,saac_6,pssm_92,saac_22,pssm_29,pssm_27,saac…
0.851013	0.836488	0.837364	0.36854	one by one-125-seqclass:1-pssm_60,pssm_17,pssm_49,pssm_57,pssm_8,pssm_63,pssm_15,pssm_42,pssm_12,saac_11,pssm_9,pssm_50,pssm_28,pssm_48,pssm_52,pssm_18,pssm_6,pssm_54,pssm_41,pssm_34,pssm_43,pssm_74,pssm_5,pssm_81,pssm_56,pssm_21,saac_42,pssm_68,pssm_2,pssm_96,pssm_20,saac_26,pssm_65,pssm_22,pssm_55,pssm_51,pssm_37,saac_14,saac_43,pssm_7,pssm_88,pssm_53,saac_6,pssm_92,saac_22,pssm_29,pssm_27,saac…
0.841816	0.8333	0.837364	0.362288	one by one-126-seqclass:1-pssm_60,pssm_17,pssm_49,pssm_57,pssm_8,pssm_63,pssm_15,pssm_42,pssm_12,saac_11,pssm_9,pssm_50,pssm_28,pssm_48,pssm_52,pssm_18,pssm_6,pssm_54,pssm_41,pssm_34,pssm_43,pssm_74,pssm_5,pssm_81,pssm_56,pssm_21,saac_42,pssm_68,pssm_2,pssm_96,pssm_20,saac_26,pssm_65,pssm_22,pssm_55,pssm_51,pssm_37,saac_14,saac_43,pssm_7,pssm_88,pssm_53,saac_6,pssm_92,saac_22,pssm_29,pssm_27,saac…
0.859674	0.838446	0.839867	0.373506	one by one-127-seqclass:1-pssm_60,pssm_17,pssm_49,pssm_57,pssm_8,pssm_63,pssm_15,pssm_42,pssm_12,saac_11,pssm_9,pssm_50,pssm_28,pssm_48,pssm_52,pssm_18,pssm_6,pssm_54,pssm_41,pssm_34,pssm_43,pssm_74,pssm_5,pssm_81,pssm_56,pssm_21,saac_42,pssm_68,pssm_2,pssm_96,pssm_20,saac_26,pssm_65,pssm_22,pssm_55,pssm_51,pssm_37,saac_14,saac_43,pssm_7,pssm_88,pssm_53,saac_6,pssm_92,saac_22,pssm_29,pssm_27,saac…
0.85573	0.839454	0.843203	0.374515	one by one-128-seqclass:1-pssm_60,pssm_17,pssm_49,pssm_57,pssm_8,pssm_63,pssm_15,pssm_42,pssm_12,saac_11,pssm_9,pssm_50,pssm_28,pssm_48,pssm_52,pssm_18,pssm_6,pssm_54,pssm_41,pssm_34,pssm_43,pssm_74,pssm_5,pssm_81,pssm_56,pssm_21,saac_42,pssm_68,pssm_2,pssm_96,pssm_20,saac_26,pssm_65,pssm_22,pssm_55,pssm_51,pssm_37,saac_14,saac_43,pssm_7,pssm_88,pssm_53,saac_6,pssm_92,saac_22,pssm_29,pssm_27,saac…
0.865763	0.846544	0.848207	0.387128	one by one-129-seqclass:1-pssm_60,pssm_17,pssm_49,pssm_57,pssm_8,pssm_63,pssm_15,pssm_42,pssm_12,saac_11,pssm_9,pssm_50,pssm_28,pssm_48,pssm_52,pssm_18,pssm_6,pssm_54,pssm_41,pssm_34,pssm_43,pssm_74,pssm_5,pssm_81,pssm_56,pssm_21,saac_42,pssm_68,pssm_2,pssm_96,pssm_20,saac_26,pssm_65,pssm_22,pssm_55,pssm_51,pssm_37,saac_14,saac_43,pssm_7,pssm_88,pssm_53,saac_6,pssm_92,saac_22,pssm_29,pssm_27,saac…
0.865292	0.845243	0.846539	0.384882	one by one-130-seqclass:1-pssm_60,pssm_17,pssm_49,pssm_57,pssm_8,pssm_63,pssm_15,pssm_42,pssm_12,saac_11,pssm_9,pssm_50,pssm_28,pssm_48,pssm_52,pssm_18,pssm_6,pssm_54,pssm_41,pssm_34,pssm_43,pssm_74,pssm_5,pssm_81,pssm_56,pssm_21,saac_42,pssm_68,pssm_2,pssm_96,pssm_20,saac_26,pssm_65,pssm_22,pssm_55,pssm_51,pssm_37,saac_14,saac_43,pssm_7,pssm_88,pssm_53,saac_6,pssm_92,saac_22,pssm_29,pssm_27,saac…
0.843336	0.835904	0.840701	0.366848	one by one-131-seqclass:1-pssm_60,pssm_17,pssm_49,pssm_57,pssm_8,pssm_63,pssm_15,pssm_42,pssm_12,saac_11,pssm_9,pssm_50,pssm_28,pssm_48,pssm_52,pssm_18,pssm_6,pssm_54,pssm_41,pssm_34,pssm_43,pssm_74,pssm_5,pssm_81,pssm_56,pssm_21,saac_42,pssm_68,pssm_2,pssm_96,pssm_20,saac_26,pssm_65,pssm_22,pssm_55,pssm_51,pssm_37,saac_14,saac_43,pssm_7,pssm_88,pssm_53,saac_6,pssm_92,saac_22,pssm_29,pssm_27,saac…
0.856201	0.840755	0.844871	0.376708	one by one-132-seqclass:1-pssm_60,pssm_17,pssm_49,pssm_57,pssm_8,pssm_63,pssm_15,pssm_42,pssm_12,saac_11,pssm_9,pssm_50,pssm_28,pssm_48,pssm_52,pssm_18,pssm_6,pssm_54,pssm_41,pssm_34,pssm_43,pssm_74,pssm_5,pssm_81,pssm_56,pssm_21,saac_42,pssm_68,pssm_2,pssm_96,pssm_20,saac_26,pssm_65,pssm_22,pssm_55,pssm_51,pssm_37,saac_14,saac_43,pssm_7,pssm_88,pssm_53,saac_6,pssm_92,saac_22,pssm_29,pssm_27,saac…
0.85839	0.836493	0.837364	0.37001	one by one-133-seqclass:1-pssm_60,pssm_17,pssm_49,pssm_57,pssm_8,pssm_63,pssm_15,pssm_42,pssm_12,saac_11,pssm_9,pssm_50,pssm_28,pssm_48,pssm_52,pssm_18,pssm_6,pssm_54,pssm_41,pssm_34,pssm_43,pssm_74,pssm_5,pssm_81,pssm_56,pssm_21,saac_42,pssm_68,pssm_2,pssm_96,pssm_20,saac_26,pssm_65,pssm_22,pssm_55,pssm_51,pssm_37,saac_14,saac_43,pssm_7,pssm_88,pssm_53,saac_6,pssm_92,saac_22,pssm_29,pssm_27,saac…
0.859568	0.839746	0.841535	0.375329	one by one-134-seqclass:1-pssm_60,pssm_17,pssm_49,pssm_57,pssm_8,pssm_63,pssm_15,pssm_42,pssm_12,saac_11,pssm_9,pssm_50,pssm_28,pssm_48,pssm_52,pssm_18,pssm_6,pssm_54,pssm_41,pssm_34,pssm_43,pssm_74,pssm_5,pssm_81,pssm_56,pssm_21,saac_42,pssm_68,pssm_2,pssm_96,pssm_20,saac_26,pssm_65,pssm_22,pssm_55,pssm_51,pssm_37,saac_14,saac_43,pssm_7,pssm_88,pssm_53,saac_6,pssm_92,saac_22,pssm_29,pssm_27,saac…
0.855688	0.840682	0.840701	0.375417	one by one-135-seqclass:1-pssm_60,pssm_17,pssm_49,pssm_57,pssm_8,pssm_63,pssm_15,pssm_42,pssm_12,saac_11,pssm_9,pssm_50,pssm_28,pssm_48,pssm_52,pssm_18,pssm_6,pssm_54,pssm_41,pssm_34,pssm_43,pssm_74,pssm_5,pssm_81,pssm_56,pssm_21,saac_42,pssm_68,pssm_2,pssm_96,pssm_20,saac_26,pssm_65,pssm_22,pssm_55,pssm_51,pssm_37,saac_14,saac_43,pssm_7,pssm_88,pssm_53,saac_6,pssm_92,saac_22,pssm_29,pssm_27,saac…
0.867952	0.842281	0.840701	0.380172	one by one-136-seqclass:1-pssm_60,pssm_17,pssm_49,pssm_57,pssm_8,pssm_63,pssm_15,pssm_42,pssm_12,saac_11,pssm_9,pssm_50,pssm_28,pssm_48,pssm_52,pssm_18,pssm_6,pssm_54,pssm_41,pssm_34,pssm_43,pssm_74,pssm_5,pssm_81,pssm_56,pssm_21,saac_42,pssm_68,pssm_2,pssm_96,pssm_20,saac_26,pssm_65,pssm_22,pssm_55,pssm_51,pssm_37,saac_14,saac_43,pssm_7,pssm_88,pssm_53,saac_6,pssm_92,saac_22,pssm_29,pssm_27,saac…
0.857102	0.844586	0.845705	0.381942	one by one-137-seqclass:1-pssm_60,pssm_17,pssm_49,pssm_57,pssm_8,pssm_63,pssm_15,pssm_42,pssm_12,saac_11,pssm_9,pssm_50,pssm_28,pssm_48,pssm_52,pssm_18,pssm_6,pssm_54,pssm_41,pssm_34,pssm_43,pssm_74,pssm_5,pssm_81,pssm_56,pssm_21,saac_42,pssm_68,pssm_2,pssm_96,pssm_20,saac_26,pssm_65,pssm_22,pssm_55,pssm_51,pssm_37,saac_14,saac_43,pssm_7,pssm_88,pssm_53,saac_6,pssm_92,saac_22,pssm_29,pssm_27,saac…
0.84741	0.836847	0.839867	0.368751	one by one-138-seqclass:1-pssm_60,pssm_17,pssm_49,pssm_57,pssm_8,pssm_63,pssm_15,pssm_42,pssm_12,saac_11,pssm_9,pssm_50,pssm_28,pssm_48,pssm_52,pssm_18,pssm_6,pssm_54,pssm_41,pssm_34,pssm_43,pssm_74,pssm_5,pssm_81,pssm_56,pssm_21,saac_42,pssm_68,pssm_2,pssm_96,pssm_20,saac_26,pssm_65,pssm_22,pssm_55,pssm_51,pssm_37,saac_14,saac_43,pssm_7,pssm_88,pssm_53,saac_6,pssm_92,saac_22,pssm_29,pssm_27,saac…
0.860852	0.841699	0.844037	0.378921	one by one-139-seqclass:1-pssm_60,pssm_17,pssm_49,pssm_57,pssm_8,pssm_63,pssm_15,pssm_42,pssm_12,saac_11,pssm_9,pssm_50,pssm_28,pssm_48,pssm_52,pssm_18,pssm_6,pssm_54,pssm_41,pssm_34,pssm_43,pssm_74,pssm_5,pssm_81,pssm_56,pssm_21,saac_42,pssm_68,pssm_2,pssm_96,pssm_20,saac_26,pssm_65,pssm_22,pssm_55,pssm_51,pssm_37,saac_14,saac_43,pssm_7,pssm_88,pssm_53,saac_6,pssm_92,saac_22,pssm_29,pssm_27,saac…
0.836795	0.839802	0.845705	0.371529	one by one-140-seqclass:1-pssm_60,pssm_17,pssm_49,pssm_57,pssm_8,pssm_63,pssm_15,pssm_42,pssm_12,saac_11,pssm_9,pssm_50,pssm_28,pssm_48,pssm_52,pssm_18,pssm_6,pssm_54,pssm_41,pssm_34,pssm_43,pssm_74,pssm_5,pssm_81,pssm_56,pssm_21,saac_42,pssm_68,pssm_2,pssm_96,pssm_20,saac_26,pssm_65,pssm_22,pssm_55,pssm_51,pssm_37,saac_14,saac_43,pssm_7,pssm_88,pssm_53,saac_6,pssm_92,saac_22,pssm_29,pssm_27,saac…
0.859328	0.849142	0.851543	0.390154	one by one-141-seqclass:1-pssm_60,pssm_17,pssm_49,pssm_57,pssm_8,pssm_63,pssm_15,pssm_42,pssm_12,saac_11,pssm_9,pssm_50,pssm_28,pssm_48,pssm_52,pssm_18,pssm_6,pssm_54,pssm_41,pssm_34,pssm_43,pssm_74,pssm_5,pssm_81,pssm_56,pssm_21,saac_42,pssm_68,pssm_2,pssm_96,pssm_20,saac_26,pssm_65,pssm_22,pssm_55,pssm_51,pssm_37,saac_14,saac_43,pssm_7,pssm_88,pssm_53,saac_6,pssm_92,saac_22,pssm_29,pssm_27,saac…
0.869236	0.844235	0.843203	0.383722	one by one-142-seqclass:1-pssm_60,pssm_17,pssm_49,pssm_57,pssm_8,pssm_63,pssm_15,pssm_42,pssm_12,saac_11,pssm_9,pssm_50,pssm_28,pssm_48,pssm_52,pssm_18,pssm_6,pssm_54,pssm_41,pssm_34,pssm_43,pssm_74,pssm_5,pssm_81,pssm_56,pssm_21,saac_42,pssm_68,pssm_2,pssm_96,pssm_20,saac_26,pssm_65,pssm_22,pssm_55,pssm_51,pssm_37,saac_14,saac_43,pssm_7,pssm_88,pssm_53,saac_6,pssm_92,saac_22,pssm_29,pssm_27,saac…
0.874618	0.850381	0.849041	0.394159	one by one-143-seqclass:1-pssm_60,pssm_17,pssm_49,pssm_57,pssm_8,pssm_63,pssm_15,pssm_42,pssm_12,saac_11,pssm_9,pssm_50,pssm_28,pssm_48,pssm_52,pssm_18,pssm_6,pssm_54,pssm_41,pssm_34,pssm_43,pssm_74,pssm_5,pssm_81,pssm_56,pssm_21,saac_42,pssm_68,pssm_2,pssm_96,pssm_20,saac_26,pssm_65,pssm_22,pssm_55,pssm_51,pssm_37,saac_14,saac_43,pssm_7,pssm_88,pssm_53,saac_6,pssm_92,saac_22,pssm_29,pssm_27,saac…
0.871486	0.852041	0.853211	0.396982	one by one-144-seqclass:1-pssm_60,pssm_17,pssm_49,pssm_57,pssm_8,pssm_63,pssm_15,pssm_42,pssm_12,saac_11,pssm_9,pssm_50,pssm_28,pssm_48,pssm_52,pssm_18,pssm_6,pssm_54,pssm_41,pssm_34,pssm_43,pssm_74,pssm_5,pssm_81,pssm_56,pssm_21,saac_42,pssm_68,pssm_2,pssm_96,pssm_20,saac_26,pssm_65,pssm_22,pssm_55,pssm_51,pssm_37,saac_14,saac_43,pssm_7,pssm_88,pssm_53,saac_6,pssm_92,saac_22,pssm_29,pssm_27,saac…
0.864821	0.843942	0.844871	0.382662	one by one-145-seqclass:1-pssm_60,pssm_17,pssm_49,pssm_57,pssm_8,pssm_63,pssm_15,pssm_42,pssm_12,saac_11,pssm_9,pssm_50,pssm_28,pssm_48,pssm_52,pssm_18,pssm_6,pssm_54,pssm_41,pssm_34,pssm_43,pssm_74,pssm_5,pssm_81,pssm_56,pssm_21,saac_42,pssm_68,pssm_2,pssm_96,pssm_20,saac_26,pssm_65,pssm_22,pssm_55,pssm_51,pssm_37,saac_14,saac_43,pssm_7,pssm_88,pssm_53,saac_6,pssm_92,saac_22,pssm_29,pssm_27,saac…
0.854783	0.846898	0.850709	0.38606	one by one-146-seqclass:1-pssm_60,pssm_17,pssm_49,pssm_57,pssm_8,pssm_63,pssm_15,pssm_42,pssm_12,saac_11,pssm_9,pssm_50,pssm_28,pssm_48,pssm_52,pssm_18,pssm_6,pssm_54,pssm_41,pssm_34,pssm_43,pssm_74,pssm_5,pssm_81,pssm_56,pssm_21,saac_42,pssm_68,pssm_2,pssm_96,pssm_20,saac_26,pssm_65,pssm_22,pssm_55,pssm_51,pssm_37,saac_14,saac_43,pssm_7,pssm_88,pssm_53,saac_6,pssm_92,saac_22,pssm_29,pssm_27,saac…
0.845114	0.842409	0.849041	0.377497	one by one-147-seqclass:1-pssm_60,pssm_17,pssm_49,pssm_57,pssm_8,pssm_63,pssm_15,pssm_42,pssm_12,saac_11,pssm_9,pssm_50,pssm_28,pssm_48,pssm_52,pssm_18,pssm_6,pssm_54,pssm_41,pssm_34,pssm_43,pssm_74,pssm_5,pssm_81,pssm_56,pssm_21,saac_42,pssm_68,pssm_2,pssm_96,pssm_20,saac_26,pssm_65,pssm_22,pssm_55,pssm_51,pssm_37,saac_14,saac_43,pssm_7,pssm_88,pssm_53,saac_6,pssm_92,saac_22,pssm_29,pssm_27,saac…
0.870309	0.848788	0.849041	0.391217	one by one-148-seqclass:1-pssm_60,pssm_17,pssm_49,pssm_57,pssm_8,pssm_63,pssm_15,pssm_42,pssm_12,saac_11,pssm_9,pssm_50,pssm_28,pssm_48,pssm_52,pssm_18,pssm_6,pssm_54,pssm_41,pssm_34,pssm_43,pssm_74,pssm_5,pssm_81,pssm_56,pssm_21,saac_42,pssm_68,pssm_2,pssm_96,pssm_20,saac_26,pssm_65,pssm_22,pssm_55,pssm_51,pssm_37,saac_14,saac_43,pssm_7,pssm_88,pssm_53,saac_6,pssm_92,saac_22,pssm_29,pssm_27,saac…
0.851867	0.835912	0.840701	0.368954	one by one-149-seqclass:1-pssm_60,pssm_17,pssm_49,pssm_57,pssm_8,pssm_63,pssm_15,pssm_42,pssm_12,saac_11,pssm_9,pssm_50,pssm_28,pssm_48,pssm_52,pssm_18,pssm_6,pssm_54,pssm_41,pssm_34,pssm_43,pssm_74,pssm_5,pssm_81,pssm_56,pssm_21,saac_42,pssm_68,pssm_2,pssm_96,pssm_20,saac_26,pssm_65,pssm_22,pssm_55,pssm_51,pssm_37,saac_14,saac_43,pssm_7,pssm_88,pssm_53,saac_6,pssm_92,saac_22,pssm_29,pssm_27,saac…
0.856201	0.840755	0.844871	0.376708	one by one-150-seqclass:1-pssm_60,pssm_17,pssm_49,pssm_57,pssm_8,pssm_63,pssm_15,pssm_42,pssm_12,saac_11,pssm_9,pssm_50,pssm_28,pssm_48,pssm_52,pssm_18,pssm_6,pssm_54,pssm_41,pssm_34,pssm_43,pssm_74,pssm_5,pssm_81,pssm_56,pssm_21,saac_42,pssm_68,pssm_2,pssm_96,pssm_20,saac_26,pssm_65,pssm_22,pssm_55,pssm_51,pssm_37,saac_14,saac_43,pssm_7,pssm_88,pssm_53,saac_6,pssm_92,saac_22,pssm_29,pssm_27,saac…
0.848482	0.8414	0.845705	0.376014	one by one-151-seqclass:1-pssm_60,pssm_17,pssm_49,pssm_57,pssm_8,pssm_63,pssm_15,pssm_42,pssm_12,saac_11,pssm_9,pssm_50,pssm_28,pssm_48,pssm_52,pssm_18,pssm_6,pssm_54,pssm_41,pssm_34,pssm_43,pssm_74,pssm_5,pssm_81,pssm_56,pssm_21,saac_42,pssm_68,pssm_2,pssm_96,pssm_20,saac_26,pssm_65,pssm_22,pssm_55,pssm_51,pssm_37,saac_14,saac_43,pssm_7,pssm_88,pssm_53,saac_6,pssm_92,saac_22,pssm_29,pssm_27,saac…
0.845114	0.842409	0.849041	0.377497	one by one-152-seqclass:1-pssm_60,pssm_17,pssm_49,pssm_57,pssm_8,pssm_63,pssm_15,pssm_42,pssm_12,saac_11,pssm_9,pssm_50,pssm_28,pssm_48,pssm_52,pssm_18,pssm_6,pssm_54,pssm_41,pssm_34,pssm_43,pssm_74,pssm_5,pssm_81,pssm_56,pssm_21,saac_42,pssm_68,pssm_2,pssm_96,pssm_20,saac_26,pssm_65,pssm_22,pssm_55,pssm_51,pssm_37,saac_14,saac_43,pssm_7,pssm_88,pssm_53,saac_6,pssm_92,saac_22,pssm_29,pssm_27,saac…
0.859568	0.839746	0.841535	0.375329	one by one-153-seqclass:1-pssm_60,pssm_17,pssm_49,pssm_57,pssm_8,pssm_63,pssm_15,pssm_42,pssm_12,saac_11,pssm_9,pssm_50,pssm_28,pssm_48,pssm_52,pssm_18,pssm_6,pssm_54,pssm_41,pssm_34,pssm_43,pssm_74,pssm_5,pssm_81,pssm_56,pssm_21,saac_42,pssm_68,pssm_2,pssm_96,pssm_20,saac_26,pssm_65,pssm_22,pssm_55,pssm_51,pssm_37,saac_14,saac_43,pssm_7,pssm_88,pssm_53,saac_6,pssm_92,saac_22,pssm_29,pssm_27,saac…
0.837631	0.843704	0.850709	0.377917	one by one-154-seqclass:1-pssm_60,pssm_17,pssm_49,pssm_57,pssm_8,pssm_63,pssm_15,pssm_42,pssm_12,saac_11,pssm_9,pssm_50,pssm_28,pssm_48,pssm_52,pssm_18,pssm_6,pssm_54,pssm_41,pssm_34,pssm_43,pssm_74,pssm_5,pssm_81,pssm_56,pssm_21,saac_42,pssm_68,pssm_2,pssm_96,pssm_20,saac_26,pssm_65,pssm_22,pssm_55,pssm_51,pssm_37,saac_14,saac_43,pssm_7,pssm_88,pssm_53,saac_6,pssm_92,saac_22,pssm_29,pssm_27,saac…
0.866941	0.849798	0.852377	0.392858	one by one-155-seqclass:1-pssm_60,pssm_17,pssm_49,pssm_57,pssm_8,pssm_63,pssm_15,pssm_42,pssm_12,saac_11,pssm_9,pssm_50,pssm_28,pssm_48,pssm_52,pssm_18,pssm_6,pssm_54,pssm_41,pssm_34,pssm_43,pssm_74,pssm_5,pssm_81,pssm_56,pssm_21,saac_42,pssm_68,pssm_2,pssm_96,pssm_20,saac_26,pssm_65,pssm_22,pssm_55,pssm_51,pssm_37,saac_14,saac_43,pssm_7,pssm_88,pssm_53,saac_6,pssm_92,saac_22,pssm_29,pssm_27,saac…
0.870309	0.848788	0.849041	0.391217	one by one-156-seqclass:1-pssm_60,pssm_17,pssm_49,pssm_57,pssm_8,pssm_63,pssm_15,pssm_42,pssm_12,saac_11,pssm_9,pssm_50,pssm_28,pssm_48,pssm_52,pssm_18,pssm_6,pssm_54,pssm_41,pssm_34,pssm_43,pssm_74,pssm_5,pssm_81,pssm_56,pssm_21,saac_42,pssm_68,pssm_2,pssm_96,pssm_20,saac_26,pssm_65,pssm_22,pssm_55,pssm_51,pssm_37,saac_14,saac_43,pssm_7,pssm_88,pssm_53,saac_6,pssm_92,saac_22,pssm_29,pssm_27,saac…
0.875561	0.852984	0.852377	0.398759	one by one-157-seqclass:1-pssm_60,pssm_17,pssm_49,pssm_57,pssm_8,pssm_63,pssm_15,pssm_42,pssm_12,saac_11,pssm_9,pssm_50,pssm_28,pssm_48,pssm_52,pssm_18,pssm_6,pssm_54,pssm_41,pssm_34,pssm_43,pssm_74,pssm_5,pssm_81,pssm_56,pssm_21,saac_42,pssm_68,pssm_2,pssm_96,pssm_20,saac_26,pssm_65,pssm_22,pssm_55,pssm_51,pssm_37,saac_14,saac_43,pssm_7,pssm_88,pssm_53,saac_6,pssm_92,saac_22,pssm_29,pssm_27,saac…
0.862631	0.848205	0.852377	0.389884	one by one-158-seqclass:1-pssm_60,pssm_17,pssm_49,pssm_57,pssm_8,pssm_63,pssm_15,pssm_42,pssm_12,saac_11,pssm_9,pssm_50,pssm_28,pssm_48,pssm_52,pssm_18,pssm_6,pssm_54,pssm_41,pssm_34,pssm_43,pssm_74,pssm_5,pssm_81,pssm_56,pssm_21,saac_42,pssm_68,pssm_2,pssm_96,pssm_20,saac_26,pssm_65,pssm_22,pssm_55,pssm_51,pssm_37,saac_14,saac_43,pssm_7,pssm_88,pssm_53,saac_6,pssm_92,saac_22,pssm_29,pssm_27,saac…
0.858557	0.847262	0.853211	0.38806	one by one-159-seqclass:1-pssm_60,pssm_17,pssm_49,pssm_57,pssm_8,pssm_63,pssm_15,pssm_42,pssm_12,saac_11,pssm_9,pssm_50,pssm_28,pssm_48,pssm_52,pssm_18,pssm_6,pssm_54,pssm_41,pssm_34,pssm_43,pssm_74,pssm_5,pssm_81,pssm_56,pssm_21,saac_42,pssm_68,pssm_2,pssm_96,pssm_20,saac_26,pssm_65,pssm_22,pssm_55,pssm_51,pssm_37,saac_14,saac_43,pssm_7,pssm_88,pssm_53,saac_6,pssm_92,saac_22,pssm_29,pssm_27,saac…
0.857143	0.843358	0.848207	0.38117	one by one-160-seqclass:1-pssm_60,pssm_17,pssm_49,pssm_57,pssm_8,pssm_63,pssm_15,pssm_42,pssm_12,saac_11,pssm_9,pssm_50,pssm_28,pssm_48,pssm_52,pssm_18,pssm_6,pssm_54,pssm_41,pssm_34,pssm_43,pssm_74,pssm_5,pssm_81,pssm_56,pssm_21,saac_42,pssm_68,pssm_2,pssm_96,pssm_20,saac_26,pssm_65,pssm_22,pssm_55,pssm_51,pssm_37,saac_14,saac_43,pssm_7,pssm_88,pssm_53,saac_6,pssm_92,saac_22,pssm_29,pssm_27,saac…
0.861924	0.846252	0.849875	0.386427	one by one-161-seqclass:1-pssm_60,pssm_17,pssm_49,pssm_57,pssm_8,pssm_63,pssm_15,pssm_42,pssm_12,saac_11,pssm_9,pssm_50,pssm_28,pssm_48,pssm_52,pssm_18,pssm_6,pssm_54,pssm_41,pssm_34,pssm_43,pssm_74,pssm_5,pssm_81,pssm_56,pssm_21,saac_42,pssm_68,pssm_2,pssm_96,pssm_20,saac_26,pssm_65,pssm_22,pssm_55,pssm_51,pssm_37,saac_14,saac_43,pssm_7,pssm_88,pssm_53,saac_6,pssm_92,saac_22,pssm_29,pssm_27,saac…
0.855148	0.849499	0.854045	0.390369	one by one-162-seqclass:1-pssm_60,pssm_17,pssm_49,pssm_57,pssm_8,pssm_63,pssm_15,pssm_42,pssm_12,saac_11,pssm_9,pssm_50,pssm_28,pssm_48,pssm_52,pssm_18,pssm_6,pssm_54,pssm_41,pssm_34,pssm_43,pssm_74,pssm_5,pssm_81,pssm_56,pssm_21,saac_42,pssm_68,pssm_2,pssm_96,pssm_20,saac_26,pssm_65,pssm_22,pssm_55,pssm_51,pssm_37,saac_14,saac_43,pssm_7,pssm_88,pssm_53,saac_6,pssm_92,saac_22,pssm_29,pssm_27,saac…
0.86647	0.848496	0.850709	0.390545	one by one-163-seqclass:1-pssm_60,pssm_17,pssm_49,pssm_57,pssm_8,pssm_63,pssm_15,pssm_42,pssm_12,saac_11,pssm_9,pssm_50,pssm_28,pssm_48,pssm_52,pssm_18,pssm_6,pssm_54,pssm_41,pssm_34,pssm_43,pssm_74,pssm_5,pssm_81,pssm_56,pssm_21,saac_42,pssm_68,pssm_2,pssm_96,pssm_20,saac_26,pssm_65,pssm_22,pssm_55,pssm_51,pssm_37,saac_14,saac_43,pssm_7,pssm_88,pssm_53,saac_6,pssm_92,saac_22,pssm_29,pssm_27,saac…
0.859264	0.849214	0.855713	0.391599	one by one-164-seqclass:1-pssm_60,pssm_17,pssm_49,pssm_57,pssm_8,pssm_63,pssm_15,pssm_42,pssm_12,saac_11,pssm_9,pssm_50,pssm_28,pssm_48,pssm_52,pssm_18,pssm_6,pssm_54,pssm_41,pssm_34,pssm_43,pssm_74,pssm_5,pssm_81,pssm_56,pssm_21,saac_42,pssm_68,pssm_2,pssm_96,pssm_20,saac_26,pssm_65,pssm_22,pssm_55,pssm_51,pssm_37,saac_14,saac_43,pssm_7,pssm_88,pssm_53,saac_6,pssm_92,saac_22,pssm_29,pssm_27,saac…
0.848953	0.842701	0.847373	0.378237	one by one-165-seqclass:1-pssm_60,pssm_17,pssm_49,pssm_57,pssm_8,pssm_63,pssm_15,pssm_42,pssm_12,saac_11,pssm_9,pssm_50,pssm_28,pssm_48,pssm_52,pssm_18,pssm_6,pssm_54,pssm_41,pssm_34,pssm_43,pssm_74,pssm_5,pssm_81,pssm_56,pssm_21,saac_42,pssm_68,pssm_2,pssm_96,pssm_20,saac_26,pssm_65,pssm_22,pssm_55,pssm_51,pssm_37,saac_14,saac_43,pssm_7,pssm_88,pssm_53,saac_6,pssm_92,saac_22,pssm_29,pssm_27,saac…
0.868119	0.853051	0.856547	0.398761	one by one-166-seqclass:1-pssm_60,pssm_17,pssm_49,pssm_57,pssm_8,pssm_63,pssm_15,pssm_42,pssm_12,saac_11,pssm_9,pssm_50,pssm_28,pssm_48,pssm_52,pssm_18,pssm_6,pssm_54,pssm_41,pssm_34,pssm_43,pssm_74,pssm_5,pssm_81,pssm_56,pssm_21,saac_42,pssm_68,pssm_2,pssm_96,pssm_20,saac_26,pssm_65,pssm_22,pssm_55,pssm_51,pssm_37,saac_14,saac_43,pssm_7,pssm_88,pssm_53,saac_6,pssm_92,saac_22,pssm_29,pssm_27,saac…
0.865186	0.846543	0.848207	0.386785	one by one-167-seqclass:1-pssm_60,pssm_17,pssm_49,pssm_57,pssm_8,pssm_63,pssm_15,pssm_42,pssm_12,saac_11,pssm_9,pssm_50,pssm_28,pssm_48,pssm_52,pssm_18,pssm_6,pssm_54,pssm_41,pssm_34,pssm_43,pssm_74,pssm_5,pssm_81,pssm_56,pssm_21,saac_42,pssm_68,pssm_2,pssm_96,pssm_20,saac_26,pssm_65,pssm_22,pssm_55,pssm_51,pssm_37,saac_14,saac_43,pssm_7,pssm_88,pssm_53,saac_6,pssm_92,saac_22,pssm_29,pssm_27,saac…
0.869731	0.848786	0.849041	0.390887	one by one-168-seqclass:1-pssm_60,pssm_17,pssm_49,pssm_57,pssm_8,pssm_63,pssm_15,pssm_42,pssm_12,saac_11,pssm_9,pssm_50,pssm_28,pssm_48,pssm_52,pssm_18,pssm_6,pssm_54,pssm_41,pssm_34,pssm_43,pssm_74,pssm_5,pssm_81,pssm_56,pssm_21,saac_42,pssm_68,pssm_2,pssm_96,pssm_20,saac_26,pssm_65,pssm_22,pssm_55,pssm_51,pssm_37,saac_14,saac_43,pssm_7,pssm_88,pssm_53,saac_6,pssm_92,saac_22,pssm_29,pssm_27,saac…
0.874748	0.852331	0.851543	0.397278	one by one-169-seqclass:1-pssm_60,pssm_17,pssm_49,pssm_57,pssm_8,pssm_63,pssm_15,pssm_42,pssm_12,saac_11,pssm_9,pssm_50,pssm_28,pssm_48,pssm_52,pssm_18,pssm_6,pssm_54,pssm_41,pssm_34,pssm_43,pssm_74,pssm_5,pssm_81,pssm_56,pssm_21,saac_42,pssm_68,pssm_2,pssm_96,pssm_20,saac_26,pssm_65,pssm_22,pssm_55,pssm_51,pssm_37,saac_14,saac_43,pssm_7,pssm_88,pssm_53,saac_6,pssm_92,saac_22,pssm_29,pssm_27,saac…
0.86319	0.852684	0.854045	0.39595	one by one-170-seqclass:1-pssm_60,pssm_17,pssm_49,pssm_57,pssm_8,pssm_63,pssm_15,pssm_42,pssm_12,saac_11,pssm_9,pssm_50,pssm_28,pssm_48,pssm_52,pssm_18,pssm_6,pssm_54,pssm_41,pssm_34,pssm_43,pssm_74,pssm_5,pssm_81,pssm_56,pssm_21,saac_42,pssm_68,pssm_2,pssm_96,pssm_20,saac_26,pssm_65,pssm_22,pssm_55,pssm_51,pssm_37,saac_14,saac_43,pssm_7,pssm_88,pssm_53,saac_6,pssm_92,saac_22,pssm_29,pssm_27,saac…
0.86913	0.845535	0.844871	0.385617	one by one-171-seqclass:1-pssm_60,pssm_17,pssm_49,pssm_57,pssm_8,pssm_63,pssm_15,pssm_42,pssm_12,saac_11,pssm_9,pssm_50,pssm_28,pssm_48,pssm_52,pssm_18,pssm_6,pssm_54,pssm_41,pssm_34,pssm_43,pssm_74,pssm_5,pssm_81,pssm_56,pssm_21,saac_42,pssm_68,pssm_2,pssm_96,pssm_20,saac_26,pssm_65,pssm_22,pssm_55,pssm_51,pssm_37,saac_14,saac_43,pssm_7,pssm_88,pssm_53,saac_6,pssm_92,saac_22,pssm_29,pssm_27,saac…
0.87569	0.854934	0.854879	0.401955	one by one-172-seqclass:1-pssm_60,pssm_17,pssm_49,pssm_57,pssm_8,pssm_63,pssm_15,pssm_42,pssm_12,saac_11,pssm_9,pssm_50,pssm_28,pssm_48,pssm_52,pssm_18,pssm_6,pssm_54,pssm_41,pssm_34,pssm_43,pssm_74,pssm_5,pssm_81,pssm_56,pssm_21,saac_42,pssm_68,pssm_2,pssm_96,pssm_20,saac_26,pssm_65,pssm_22,pssm_55,pssm_51,pssm_37,saac_14,saac_43,pssm_7,pssm_88,pssm_53,saac_6,pssm_92,saac_22,pssm_29,pssm_27,saac…
0.850838	0.847906	0.854045	0.387393	one by one-173-seqclass:1-pssm_60,pssm_17,pssm_49,pssm_57,pssm_8,pssm_63,pssm_15,pssm_42,pssm_12,saac_11,pssm_9,pssm_50,pssm_28,pssm_48,pssm_52,pssm_18,pssm_6,pssm_54,pssm_41,pssm_34,pssm_43,pssm_74,pssm_5,pssm_81,pssm_56,pssm_21,saac_42,pssm_68,pssm_2,pssm_96,pssm_20,saac_26,pssm_65,pssm_22,pssm_55,pssm_51,pssm_37,saac_14,saac_43,pssm_7,pssm_88,pssm_53,saac_6,pssm_92,saac_22,pssm_29,pssm_27,saac…
0.862054	0.848203	0.852377	0.38952	one by one-174-seqclass:1-pssm_60,pssm_17,pssm_49,pssm_57,pssm_8,pssm_63,pssm_15,pssm_42,pssm_12,saac_11,pssm_9,pssm_50,pssm_28,pssm_48,pssm_52,pssm_18,pssm_6,pssm_54,pssm_41,pssm_34,pssm_43,pssm_74,pssm_5,pssm_81,pssm_56,pssm_21,saac_42,pssm_68,pssm_2,pssm_96,pssm_20,saac_26,pssm_65,pssm_22,pssm_55,pssm_51,pssm_37,saac_14,saac_43,pssm_7,pssm_88,pssm_53,saac_6,pssm_92,saac_22,pssm_29,pssm_27,saac…
0.854099	0.848197	0.852377	0.387689	one by one-175-seqclass:1-pssm_60,pssm_17,pssm_49,pssm_57,pssm_8,pssm_63,pssm_15,pssm_42,pssm_12,saac_11,pssm_9,pssm_50,pssm_28,pssm_48,pssm_52,pssm_18,pssm_6,pssm_54,pssm_41,pssm_34,pssm_43,pssm_74,pssm_5,pssm_81,pssm_56,pssm_21,saac_42,pssm_68,pssm_2,pssm_96,pssm_20,saac_26,pssm_65,pssm_22,pssm_55,pssm_51,pssm_37,saac_14,saac_43,pssm_7,pssm_88,pssm_53,saac_6,pssm_92,saac_22,pssm_29,pssm_27,saac…
0.866941	0.849798	0.852377	0.392858	one by one-176-seqclass:1-pssm_60,pssm_17,pssm_49,pssm_57,pssm_8,pssm_63,pssm_15,pssm_42,pssm_12,saac_11,pssm_9,pssm_50,pssm_28,pssm_48,pssm_52,pssm_18,pssm_6,pssm_54,pssm_41,pssm_34,pssm_43,pssm_74,pssm_5,pssm_81,pssm_56,pssm_21,saac_42,pssm_68,pssm_2,pssm_96,pssm_20,saac_26,pssm_65,pssm_22,pssm_55,pssm_51,pssm_37,saac_14,saac_43,pssm_7,pssm_88,pssm_53,saac_6,pssm_92,saac_22,pssm_29,pssm_27,saac…
0.870309	0.848788	0.849041	0.391217	one by one-177-seqclass:1-pssm_60,pssm_17,pssm_49,pssm_57,pssm_8,pssm_63,pssm_15,pssm_42,pssm_12,saac_11,pssm_9,pssm_50,pssm_28,pssm_48,pssm_52,pssm_18,pssm_6,pssm_54,pssm_41,pssm_34,pssm_43,pssm_74,pssm_5,pssm_81,pssm_56,pssm_21,saac_42,pssm_68,pssm_2,pssm_96,pssm_20,saac_26,pssm_65,pssm_22,pssm_55,pssm_51,pssm_37,saac_14,saac_43,pssm_7,pssm_88,pssm_53,saac_6,pssm_92,saac_22,pssm_29,pssm_27,saac…
0.871852	0.854642	0.856547	0.401378	one by one-178-seqclass:1-pssm_60,pssm_17,pssm_49,pssm_57,pssm_8,pssm_63,pssm_15,pssm_42,pssm_12,saac_11,pssm_9,pssm_50,pssm_28,pssm_48,pssm_52,pssm_18,pssm_6,pssm_54,pssm_41,pssm_34,pssm_43,pssm_74,pssm_5,pssm_81,pssm_56,pssm_21,saac_42,pssm_68,pssm_2,pssm_96,pssm_20,saac_26,pssm_65,pssm_22,pssm_55,pssm_51,pssm_37,saac_14,saac_43,pssm_7,pssm_88,pssm_53,saac_6,pssm_92,saac_22,pssm_29,pssm_27,saac…
0.867306	0.852398	0.855713	0.397211	one by one-179-seqclass:1-pssm_60,pssm_17,pssm_49,pssm_57,pssm_8,pssm_63,pssm_15,pssm_42,pssm_12,saac_11,pssm_9,pssm_50,pssm_28,pssm_48,pssm_52,pssm_18,pssm_6,pssm_54,pssm_41,pssm_34,pssm_43,pssm_74,pssm_5,pssm_81,pssm_56,pssm_21,saac_42,pssm_68,pssm_2,pssm_96,pssm_20,saac_26,pssm_65,pssm_22,pssm_55,pssm_51,pssm_37,saac_14,saac_43,pssm_7,pssm_88,pssm_53,saac_6,pssm_92,saac_22,pssm_29,pssm_27,saac…
0.879529	0.855226	0.853211	0.402544	one by one-180-seqclass:1-pssm_60,pssm_17,pssm_49,pssm_57,pssm_8,pssm_63,pssm_15,pssm_42,pssm_12,saac_11,pssm_9,pssm_50,pssm_28,pssm_48,pssm_52,pssm_18,pssm_6,pssm_54,pssm_41,pssm_34,pssm_43,pssm_74,pssm_5,pssm_81,pssm_56,pssm_21,saac_42,pssm_68,pssm_2,pssm_96,pssm_20,saac_26,pssm_65,pssm_22,pssm_55,pssm_51,pssm_37,saac_14,saac_43,pssm_7,pssm_88,pssm_53,saac_6,pssm_92,saac_22,pssm_29,pssm_27,saac…
0.860039	0.841047	0.843203	0.377499	one by one-181-seqclass:1-pssm_60,pssm_17,pssm_49,pssm_57,pssm_8,pssm_63,pssm_15,pssm_42,pssm_12,saac_11,pssm_9,pssm_50,pssm_28,pssm_48,pssm_52,pssm_18,pssm_6,pssm_54,pssm_41,pssm_34,pssm_43,pssm_74,pssm_5,pssm_81,pssm_56,pssm_21,saac_42,pssm_68,pssm_2,pssm_96,pssm_20,saac_26,pssm_65,pssm_22,pssm_55,pssm_51,pssm_37,saac_14,saac_43,pssm_7,pssm_88,pssm_53,saac_6,pssm_92,saac_22,pssm_29,pssm_27,saac…
0.865292	0.845243	0.846539	0.384882	one by one-182-seqclass:1-pssm_60,pssm_17,pssm_49,pssm_57,pssm_8,pssm_63,pssm_15,pssm_42,pssm_12,saac_11,pssm_9,pssm_50,pssm_28,pssm_48,pssm_52,pssm_18,pssm_6,pssm_54,pssm_41,pssm_34,pssm_43,pssm_74,pssm_5,pssm_81,pssm_56,pssm_21,saac_42,pssm_68,pssm_2,pssm_96,pssm_20,saac_26,pssm_65,pssm_22,pssm_55,pssm_51,pssm_37,saac_14,saac_43,pssm_7,pssm_88,pssm_53,saac_6,pssm_92,saac_22,pssm_29,pssm_27,saac…
0.879294	0.854575	0.852377	0.401378	one by one-183-seqclass:1-pssm_60,pssm_17,pssm_49,pssm_57,pssm_8,pssm_63,pssm_15,pssm_42,pssm_12,saac_11,pssm_9,pssm_50,pssm_28,pssm_48,pssm_52,pssm_18,pssm_6,pssm_54,pssm_41,pssm_34,pssm_43,pssm_74,pssm_5,pssm_81,pssm_56,pssm_21,saac_42,pssm_68,pssm_2,pssm_96,pssm_20,saac_26,pssm_65,pssm_22,pssm_55,pssm_51,pssm_37,saac_14,saac_43,pssm_7,pssm_88,pssm_53,saac_6,pssm_92,saac_22,pssm_29,pssm_27,saac…
0.848482	0.8414	0.845705	0.376014	one by one-184-seqclass:1-pssm_60,pssm_17,pssm_49,pssm_57,pssm_8,pssm_63,pssm_15,pssm_42,pssm_12,saac_11,pssm_9,pssm_50,pssm_28,pssm_48,pssm_52,pssm_18,pssm_6,pssm_54,pssm_41,pssm_34,pssm_43,pssm_74,pssm_5,pssm_81,pssm_56,pssm_21,saac_42,pssm_68,pssm_2,pssm_96,pssm_20,saac_26,pssm_65,pssm_22,pssm_55,pssm_51,pssm_37,saac_14,saac_43,pssm_7,pssm_88,pssm_53,saac_6,pssm_92,saac_22,pssm_29,pssm_27,saac…
0.876162	0.856235	0.856547	0.404336	one by one-185-seqclass:1-pssm_60,pssm_17,pssm_49,pssm_57,pssm_8,pssm_63,pssm_15,pssm_42,pssm_12,saac_11,pssm_9,pssm_50,pssm_28,pssm_48,pssm_52,pssm_18,pssm_6,pssm_54,pssm_41,pssm_34,pssm_43,pssm_74,pssm_5,pssm_81,pssm_56,pssm_21,saac_42,pssm_68,pssm_2,pssm_96,pssm_20,saac_26,pssm_65,pssm_22,pssm_55,pssm_51,pssm_37,saac_14,saac_43,pssm_7,pssm_88,pssm_53,saac_6,pssm_92,saac_22,pssm_29,pssm_27,saac…
0.871616	0.853991	0.855713	0.400184	one by one-186-seqclass:1-pssm_60,pssm_17,pssm_49,pssm_57,pssm_8,pssm_63,pssm_15,pssm_42,pssm_12,saac_11,pssm_9,pssm_50,pssm_28,pssm_48,pssm_52,pssm_18,pssm_6,pssm_54,pssm_41,pssm_34,pssm_43,pssm_74,pssm_5,pssm_81,pssm_56,pssm_21,saac_42,pssm_68,pssm_2,pssm_96,pssm_20,saac_26,pssm_65,pssm_22,pssm_55,pssm_51,pssm_37,saac_14,saac_43,pssm_7,pssm_88,pssm_53,saac_6,pssm_92,saac_22,pssm_29,pssm_27,saac…
0.854571	0.849497	0.854045	0.390017	one by one-187-seqclass:1-pssm_60,pssm_17,pssm_49,pssm_57,pssm_8,pssm_63,pssm_15,pssm_42,pssm_12,saac_11,pssm_9,pssm_50,pssm_28,pssm_48,pssm_52,pssm_18,pssm_6,pssm_54,pssm_41,pssm_34,pssm_43,pssm_74,pssm_5,pssm_81,pssm_56,pssm_21,saac_42,pssm_68,pssm_2,pssm_96,pssm_20,saac_26,pssm_65,pssm_22,pssm_55,pssm_51,pssm_37,saac_14,saac_43,pssm_7,pssm_88,pssm_53,saac_6,pssm_92,saac_22,pssm_29,pssm_27,saac…
0.8675	0.854277	0.854045	0.398893	one by one-188-seqclass:1-pssm_60,pssm_17,pssm_49,pssm_57,pssm_8,pssm_63,pssm_15,pssm_42,pssm_12,saac_11,pssm_9,pssm_50,pssm_28,pssm_48,pssm_52,pssm_18,pssm_6,pssm_54,pssm_41,pssm_34,pssm_43,pssm_74,pssm_5,pssm_81,pssm_56,pssm_21,saac_42,pssm_68,pssm_2,pssm_96,pssm_20,saac_26,pssm_65,pssm_22,pssm_55,pssm_51,pssm_37,saac_14,saac_43,pssm_7,pssm_88,pssm_53,saac_6,pssm_92,saac_22,pssm_29,pssm_27,saac…
0.86926	0.847485	0.847373	0.388629	one by one-189-seqclass:1-pssm_60,pssm_17,pssm_49,pssm_57,pssm_8,pssm_63,pssm_15,pssm_42,pssm_12,saac_11,pssm_9,pssm_50,pssm_28,pssm_48,pssm_52,pssm_18,pssm_6,pssm_54,pssm_41,pssm_34,pssm_43,pssm_74,pssm_5,pssm_81,pssm_56,pssm_21,saac_42,pssm_68,pssm_2,pssm_96,pssm_20,saac_26,pssm_65,pssm_22,pssm_55,pssm_51,pssm_37,saac_14,saac_43,pssm_7,pssm_88,pssm_53,saac_6,pssm_92,saac_22,pssm_29,pssm_27,saac…
0.866835	0.851097	0.854045	0.394846	one by one-190-seqclass:1-pssm_60,pssm_17,pssm_49,pssm_57,pssm_8,pssm_63,pssm_15,pssm_42,pssm_12,saac_11,pssm_9,pssm_50,pssm_28,pssm_48,pssm_52,pssm_18,pssm_6,pssm_54,pssm_41,pssm_34,pssm_43,pssm_74,pssm_5,pssm_81,pssm_56,pssm_21,saac_42,pssm_68,pssm_2,pssm_96,pssm_20,saac_26,pssm_65,pssm_22,pssm_55,pssm_51,pssm_37,saac_14,saac_43,pssm_7,pssm_88,pssm_53,saac_6,pssm_92,saac_22,pssm_29,pssm_27,saac…
0.871145	0.85269	0.854045	0.397818	one by one-191-seqclass:1-pssm_60,pssm_17,pssm_49,pssm_57,pssm_8,pssm_63,pssm_15,pssm_42,pssm_12,saac_11,pssm_9,pssm_50,pssm_28,pssm_48,pssm_52,pssm_18,pssm_6,pssm_54,pssm_41,pssm_34,pssm_43,pssm_74,pssm_5,pssm_81,pssm_56,pssm_21,saac_42,pssm_68,pssm_2,pssm_96,pssm_20,saac_26,pssm_65,pssm_22,pssm_55,pssm_51,pssm_37,saac_14,saac_43,pssm_7,pssm_88,pssm_53,saac_6,pssm_92,saac_22,pssm_29,pssm_27,saac…
0.852215	0.842991	0.845705	0.378647	one by one-192-seqclass:1-pssm_60,pssm_17,pssm_49,pssm_57,pssm_8,pssm_63,pssm_15,pssm_42,pssm_12,saac_11,pssm_9,pssm_50,pssm_28,pssm_48,pssm_52,pssm_18,pssm_6,pssm_54,pssm_41,pssm_34,pssm_43,pssm_74,pssm_5,pssm_81,pssm_56,pssm_21,saac_42,pssm_68,pssm_2,pssm_96,pssm_20,saac_26,pssm_65,pssm_22,pssm_55,pssm_51,pssm_37,saac_14,saac_43,pssm_7,pssm_88,pssm_53,saac_6,pssm_92,saac_22,pssm_29,pssm_27,saac…
0.872194	0.853993	0.855713	0.400525	one by one-193-seqclass:1-pssm_60,pssm_17,pssm_49,pssm_57,pssm_8,pssm_63,pssm_15,pssm_42,pssm_12,saac_11,pssm_9,pssm_50,pssm_28,pssm_48,pssm_52,pssm_18,pssm_6,pssm_54,pssm_41,pssm_34,pssm_43,pssm_74,pssm_5,pssm_81,pssm_56,pssm_21,saac_42,pssm_68,pssm_2,pssm_96,pssm_20,saac_26,pssm_65,pssm_22,pssm_55,pssm_51,pssm_37,saac_14,saac_43,pssm_7,pssm_88,pssm_53,saac_6,pssm_92,saac_22,pssm_29,pssm_27,saac…
0.861305	0.847479	0.847373	0.386795	one by one-194-seqclass:1-pssm_60,pssm_17,pssm_49,pssm_57,pssm_8,pssm_63,pssm_15,pssm_42,pssm_12,saac_11,pssm_9,pssm_50,pssm_28,pssm_48,pssm_52,pssm_18,pssm_6,pssm_54,pssm_41,pssm_34,pssm_43,pssm_74,pssm_5,pssm_81,pssm_56,pssm_21,saac_42,pssm_68,pssm_2,pssm_96,pssm_20,saac_26,pssm_65,pssm_22,pssm_55,pssm_51,pssm_37,saac_14,saac_43,pssm_7,pssm_88,pssm_53,saac_6,pssm_92,saac_22,pssm_29,pssm_27,saac…
0.880707	0.858479	0.857381	0.40848	one by one-195-seqclass:1-pssm_60,pssm_17,pssm_49,pssm_57,pssm_8,pssm_63,pssm_15,pssm_42,pssm_12,saac_11,pssm_9,pssm_50,pssm_28,pssm_48,pssm_52,pssm_18,pssm_6,pssm_54,pssm_41,pssm_34,pssm_43,pssm_74,pssm_5,pssm_81,pssm_56,pssm_21,saac_42,pssm_68,pssm_2,pssm_96,pssm_20,saac_26,pssm_65,pssm_22,pssm_55,pssm_51,pssm_37,saac_14,saac_43,pssm_7,pssm_88,pssm_53,saac_6,pssm_92,saac_22,pssm_29,pssm_27,saac…
0.876032	0.854285	0.854045	0.4011	one by one-196-seqclass:1-pssm_60,pssm_17,pssm_49,pssm_57,pssm_8,pssm_63,pssm_15,pssm_42,pssm_12,saac_11,pssm_9,pssm_50,pssm_28,pssm_48,pssm_52,pssm_18,pssm_6,pssm_54,pssm_41,pssm_34,pssm_43,pssm_74,pssm_5,pssm_81,pssm_56,pssm_21,saac_42,pssm_68,pssm_2,pssm_96,pssm_20,saac_26,pssm_65,pssm_22,pssm_55,pssm_51,pssm_37,saac_14,saac_43,pssm_7,pssm_88,pssm_53,saac_6,pssm_92,saac_22,pssm_29,pssm_27,saac…
0.872087	0.855293	0.857381	0.402579	one by one-197-seqclass:1-pssm_60,pssm_17,pssm_49,pssm_57,pssm_8,pssm_63,pssm_15,pssm_42,pssm_12,saac_11,pssm_9,pssm_50,pssm_28,pssm_48,pssm_52,pssm_18,pssm_6,pssm_54,pssm_41,pssm_34,pssm_43,pssm_74,pssm_5,pssm_81,pssm_56,pssm_21,saac_42,pssm_68,pssm_2,pssm_96,pssm_20,saac_26,pssm_65,pssm_22,pssm_55,pssm_51,pssm_37,saac_14,saac_43,pssm_7,pssm_88,pssm_53,saac_6,pssm_92,saac_22,pssm_29,pssm_27,saac…
0.871616	0.853991	0.855713	0.400184	one by one-198-seqclass:1-pssm_60,pssm_17,pssm_49,pssm_57,pssm_8,pssm_63,pssm_15,pssm_42,pssm_12,saac_11,pssm_9,pssm_50,pssm_28,pssm_48,pssm_52,pssm_18,pssm_6,pssm_54,pssm_41,pssm_34,pssm_43,pssm_74,pssm_5,pssm_81,pssm_56,pssm_21,saac_42,pssm_68,pssm_2,pssm_96,pssm_20,saac_26,pssm_65,pssm_22,pssm_55,pssm_51,pssm_37,saac_14,saac_43,pssm_7,pssm_88,pssm_53,saac_6,pssm_92,saac_22,pssm_29,pssm_27,saac…
0.884676	0.860721	0.858215	0.412291	one by one-199-seqclass:1-pssm_60,pssm_17,pssm_49,pssm_57,pssm_8,pssm_63,pssm_15,pssm_42,pssm_12,saac_11,pssm_9,pssm_50,pssm_28,pssm_48,pssm_52,pssm_18,pssm_6,pssm_54,pssm_41,pssm_34,pssm_43,pssm_74,pssm_5,pssm_81,pssm_56,pssm_21,saac_42,pssm_68,pssm_2,pssm_96,pssm_20,saac_26,pssm_65,pssm_22,pssm_55,pssm_51,pssm_37,saac_14,saac_43,pssm_7,pssm_88,pssm_53,saac_6,pssm_92,saac_22,pssm_29,pssm_27,saac…
0.87303	0.857895	0.860717	0.407458	one by one-200-seqclass:1-pssm_60,pssm_17,pssm_49,pssm_57,pssm_8,pssm_63,pssm_15,pssm_42,pssm_12,saac_11,pssm_9,pssm_50,pssm_28,pssm_48,pssm_52,pssm_18,pssm_6,pssm_54,pssm_41,pssm_34,pssm_43,pssm_74,pssm_5,pssm_81,pssm_56,pssm_21,saac_42,pssm_68,pssm_2,pssm_96,pssm_20,saac_26,pssm_65,pssm_22,pssm_55,pssm_51,pssm_37,saac_14,saac_43,pssm_7,pssm_88,pssm_53,saac_6,pssm_92,saac_22,pssm_29,pssm_27,saac…
0.863662	0.853985	0.855713	0.398307	one by one-201-seqclass:1-pssm_60,pssm_17,pssm_49,pssm_57,pssm_8,pssm_63,pssm_15,pssm_42,pssm_12,saac_11,pssm_9,pssm_50,pssm_28,pssm_48,pssm_52,pssm_18,pssm_6,pssm_54,pssm_41,pssm_34,pssm_43,pssm_74,pssm_5,pssm_81,pssm_56,pssm_21,saac_42,pssm_68,pssm_2,pssm_96,pssm_20,saac_26,pssm_65,pssm_22,pssm_55,pssm_51,pssm_37,saac_14,saac_43,pssm_7,pssm_88,pssm_53,saac_6,pssm_92,saac_22,pssm_29,pssm_27,saac…
0.871145	0.85269	0.854045	0.397818	one by one-202-seqclass:1-pssm_60,pssm_17,pssm_49,pssm_57,pssm_8,pssm_63,pssm_15,pssm_42,pssm_12,saac_11,pssm_9,pssm_50,pssm_28,pssm_48,pssm_52,pssm_18,pssm_6,pssm_54,pssm_41,pssm_34,pssm_43,pssm_74,pssm_5,pssm_81,pssm_56,pssm_21,saac_42,pssm_68,pssm_2,pssm_96,pssm_20,saac_26,pssm_65,pssm_22,pssm_55,pssm_51,pssm_37,saac_14,saac_43,pssm_7,pssm_88,pssm_53,saac_6,pssm_92,saac_22,pssm_29,pssm_27,saac…
0.879423	0.856525	0.854879	0.404563	one by one-203-seqclass:1-pssm_60,pssm_17,pssm_49,pssm_57,pssm_8,pssm_63,pssm_15,pssm_42,pssm_12,saac_11,pssm_9,pssm_50,pssm_28,pssm_48,pssm_52,pssm_18,pssm_6,pssm_54,pssm_41,pssm_34,pssm_43,pssm_74,pssm_5,pssm_81,pssm_56,pssm_21,saac_42,pssm_68,pssm_2,pssm_96,pssm_20,saac_26,pssm_65,pssm_22,pssm_55,pssm_51,pssm_37,saac_14,saac_43,pssm_7,pssm_88,pssm_53,saac_6,pssm_92,saac_22,pssm_29,pssm_27,saac…
0.874877	0.854282	0.854045	0.400429	one by one-204-seqclass:1-pssm_60,pssm_17,pssm_49,pssm_57,pssm_8,pssm_63,pssm_15,pssm_42,pssm_12,saac_11,pssm_9,pssm_50,pssm_28,pssm_48,pssm_52,pssm_18,pssm_6,pssm_54,pssm_41,pssm_34,pssm_43,pssm_74,pssm_5,pssm_81,pssm_56,pssm_21,saac_42,pssm_68,pssm_2,pssm_96,pssm_20,saac_26,pssm_65,pssm_22,pssm_55,pssm_51,pssm_37,saac_14,saac_43,pssm_7,pssm_88,pssm_53,saac_6,pssm_92,saac_22,pssm_29,pssm_27,saac…
0.868443	0.856879	0.857381	0.403637	one by one-205-seqclass:1-pssm_60,pssm_17,pssm_49,pssm_57,pssm_8,pssm_63,pssm_15,pssm_42,pssm_12,saac_11,pssm_9,pssm_50,pssm_28,pssm_48,pssm_52,pssm_18,pssm_6,pssm_54,pssm_41,pssm_34,pssm_43,pssm_74,pssm_5,pssm_81,pssm_56,pssm_21,saac_42,pssm_68,pssm_2,pssm_96,pssm_20,saac_26,pssm_65,pssm_22,pssm_55,pssm_51,pssm_37,saac_14,saac_43,pssm_7,pssm_88,pssm_53,saac_6,pssm_92,saac_22,pssm_29,pssm_27,saac…
0.881178	0.85978	0.859049	0.410905	one by one-206-seqclass:1-pssm_60,pssm_17,pssm_49,pssm_57,pssm_8,pssm_63,pssm_15,pssm_42,pssm_12,saac_11,pssm_9,pssm_50,pssm_28,pssm_48,pssm_52,pssm_18,pssm_6,pssm_54,pssm_41,pssm_34,pssm_43,pssm_74,pssm_5,pssm_81,pssm_56,pssm_21,saac_42,pssm_68,pssm_2,pssm_96,pssm_20,saac_26,pssm_65,pssm_22,pssm_55,pssm_51,pssm_37,saac_14,saac_43,pssm_7,pssm_88,pssm_53,saac_6,pssm_92,saac_22,pssm_29,pssm_27,saac…
0.881308	0.861731	0.861551	0.414255	one by one-207-seqclass:1-pssm_60,pssm_17,pssm_49,pssm_57,pssm_8,pssm_63,pssm_15,pssm_42,pssm_12,saac_11,pssm_9,pssm_50,pssm_28,pssm_48,pssm_52,pssm_18,pssm_6,pssm_54,pssm_41,pssm_34,pssm_43,pssm_74,pssm_5,pssm_81,pssm_56,pssm_21,saac_42,pssm_68,pssm_2,pssm_96,pssm_20,saac_26,pssm_65,pssm_22,pssm_55,pssm_51,pssm_37,saac_14,saac_43,pssm_7,pssm_88,pssm_53,saac_6,pssm_92,saac_22,pssm_29,pssm_27,saac…
0.881848	0.852913	0.848207	0.398264	one by one-208-seqclass:1-pssm_60,pssm_17,pssm_49,pssm_57,pssm_8,pssm_63,pssm_15,pssm_42,pssm_12,saac_11,pssm_9,pssm_50,pssm_28,pssm_48,pssm_52,pssm_18,pssm_6,pssm_54,pssm_41,pssm_34,pssm_43,pssm_74,pssm_5,pssm_81,pssm_56,pssm_21,saac_42,pssm_68,pssm_2,pssm_96,pssm_20,saac_26,pssm_65,pssm_22,pssm_55,pssm_51,pssm_37,saac_14,saac_43,pssm_7,pssm_88,pssm_53,saac_6,pssm_92,saac_22,pssm_29,pssm_27,saac…
0.862719	0.851383	0.852377	0.39362	one by one-209-seqclass:1-pssm_60,pssm_17,pssm_49,pssm_57,pssm_8,pssm_63,pssm_15,pssm_42,pssm_12,saac_11,pssm_9,pssm_50,pssm_28,pssm_48,pssm_52,pssm_18,pssm_6,pssm_54,pssm_41,pssm_34,pssm_43,pssm_74,pssm_5,pssm_81,pssm_56,pssm_21,saac_42,pssm_68,pssm_2,pssm_96,pssm_20,saac_26,pssm_65,pssm_22,pssm_55,pssm_51,pssm_37,saac_14,saac_43,pssm_7,pssm_88,pssm_53,saac_6,pssm_92,saac_22,pssm_29,pssm_27,saac…
0.874171	0.85233	0.851543	0.396935	one by one-210-seqclass:1-pssm_60,pssm_17,pssm_49,pssm_57,pssm_8,pssm_63,pssm_15,pssm_42,pssm_12,saac_11,pssm_9,pssm_50,pssm_28,pssm_48,pssm_52,pssm_18,pssm_6,pssm_54,pssm_41,pssm_34,pssm_43,pssm_74,pssm_5,pssm_81,pssm_56,pssm_21,saac_42,pssm_68,pssm_2,pssm_96,pssm_20,saac_26,pssm_65,pssm_22,pssm_55,pssm_51,pssm_37,saac_14,saac_43,pssm_7,pssm_88,pssm_53,saac_6,pssm_92,saac_22,pssm_29,pssm_27,saac…
0.876739	0.856237	0.856547	0.404664	one by one-211-seqclass:1-pssm_60,pssm_17,pssm_49,pssm_57,pssm_8,pssm_63,pssm_15,pssm_42,pssm_12,saac_11,pssm_9,pssm_50,pssm_28,pssm_48,pssm_52,pssm_18,pssm_6,pssm_54,pssm_41,pssm_34,pssm_43,pssm_74,pssm_5,pssm_81,pssm_56,pssm_21,saac_42,pssm_68,pssm_2,pssm_96,pssm_20,saac_26,pssm_65,pssm_22,pssm_55,pssm_51,pssm_37,saac_14,saac_43,pssm_7,pssm_88,pssm_53,saac_6,pssm_92,saac_22,pssm_29,pssm_27,saac…
0.872323	0.855944	0.858215	0.403787	one by one-212-seqclass:1-pssm_60,pssm_17,pssm_49,pssm_57,pssm_8,pssm_63,pssm_15,pssm_42,pssm_12,saac_11,pssm_9,pssm_50,pssm_28,pssm_48,pssm_52,pssm_18,pssm_6,pssm_54,pssm_41,pssm_34,pssm_43,pssm_74,pssm_5,pssm_81,pssm_56,pssm_21,saac_42,pssm_68,pssm_2,pssm_96,pssm_20,saac_26,pssm_65,pssm_22,pssm_55,pssm_51,pssm_37,saac_14,saac_43,pssm_7,pssm_88,pssm_53,saac_6,pssm_92,saac_22,pssm_29,pssm_27,saac…
0.880471	0.857828	0.856547	0.407279	one by one-213-seqclass:1-pssm_60,pssm_17,pssm_49,pssm_57,pssm_8,pssm_63,pssm_15,pssm_42,pssm_12,saac_11,pssm_9,pssm_50,pssm_28,pssm_48,pssm_52,pssm_18,pssm_6,pssm_54,pssm_41,pssm_34,pssm_43,pssm_74,pssm_5,pssm_81,pssm_56,pssm_21,saac_42,pssm_68,pssm_2,pssm_96,pssm_20,saac_26,pssm_65,pssm_22,pssm_55,pssm_51,pssm_37,saac_14,saac_43,pssm_7,pssm_88,pssm_53,saac_6,pssm_92,saac_22,pssm_29,pssm_27,saac…
0.865547	0.85919	0.862385	0.408029	one by one-214-seqclass:1-pssm_60,pssm_17,pssm_49,pssm_57,pssm_8,pssm_63,pssm_15,pssm_42,pssm_12,saac_11,pssm_9,pssm_50,pssm_28,pssm_48,pssm_52,pssm_18,pssm_6,pssm_54,pssm_41,pssm_34,pssm_43,pssm_74,pssm_5,pssm_81,pssm_56,pssm_21,saac_42,pssm_68,pssm_2,pssm_96,pssm_20,saac_26,pssm_65,pssm_22,pssm_55,pssm_51,pssm_37,saac_14,saac_43,pssm_7,pssm_88,pssm_53,saac_6,pssm_92,saac_22,pssm_29,pssm_27,saac…
0.879399	0.853275	0.850709	0.399374	one by one-215-seqclass:1-pssm_60,pssm_17,pssm_49,pssm_57,pssm_8,pssm_63,pssm_15,pssm_42,pssm_12,saac_11,pssm_9,pssm_50,pssm_28,pssm_48,pssm_52,pssm_18,pssm_6,pssm_54,pssm_41,pssm_34,pssm_43,pssm_74,pssm_5,pssm_81,pssm_56,pssm_21,saac_42,pssm_68,pssm_2,pssm_96,pssm_20,saac_26,pssm_65,pssm_22,pssm_55,pssm_51,pssm_37,saac_14,saac_43,pssm_7,pssm_88,pssm_53,saac_6,pssm_92,saac_22,pssm_29,pssm_27,saac…
0.871486	0.852041	0.853211	0.396982	one by one-216-seqclass:1-pssm_60,pssm_17,pssm_49,pssm_57,pssm_8,pssm_63,pssm_15,pssm_42,pssm_12,saac_11,pssm_9,pssm_50,pssm_28,pssm_48,pssm_52,pssm_18,pssm_6,pssm_54,pssm_41,pssm_34,pssm_43,pssm_74,pssm_5,pssm_81,pssm_56,pssm_21,saac_42,pssm_68,pssm_2,pssm_96,pssm_20,saac_26,pssm_65,pssm_22,pssm_55,pssm_51,pssm_37,saac_14,saac_43,pssm_7,pssm_88,pssm_53,saac_6,pssm_92,saac_22,pssm_29,pssm_27,saac…
0.869639	0.855655	0.859883	0.403952	one by one-217-seqclass:1-pssm_60,pssm_17,pssm_49,pssm_57,pssm_8,pssm_63,pssm_15,pssm_42,pssm_12,saac_11,pssm_9,pssm_50,pssm_28,pssm_48,pssm_52,pssm_18,pssm_6,pssm_54,pssm_41,pssm_34,pssm_43,pssm_74,pssm_5,pssm_81,pssm_56,pssm_21,saac_42,pssm_68,pssm_2,pssm_96,pssm_20,saac_26,pssm_65,pssm_22,pssm_55,pssm_51,pssm_37,saac_14,saac_43,pssm_7,pssm_88,pssm_53,saac_6,pssm_92,saac_22,pssm_29,pssm_27,saac…
0.871958	0.853343	0.854879	0.399337	one by one-218-seqclass:1-pssm_60,pssm_17,pssm_49,pssm_57,pssm_8,pssm_63,pssm_15,pssm_42,pssm_12,saac_11,pssm_9,pssm_50,pssm_28,pssm_48,pssm_52,pssm_18,pssm_6,pssm_54,pssm_41,pssm_34,pssm_43,pssm_74,pssm_5,pssm_81,pssm_56,pssm_21,saac_42,pssm_68,pssm_2,pssm_96,pssm_20,saac_26,pssm_65,pssm_22,pssm_55,pssm_51,pssm_37,saac_14,saac_43,pssm_7,pssm_88,pssm_53,saac_6,pssm_92,saac_22,pssm_29,pssm_27,saac…
0.889091	0.861015	0.856547	0.413119	one by one-219-seqclass:1-pssm_60,pssm_17,pssm_49,pssm_57,pssm_8,pssm_63,pssm_15,pssm_42,pssm_12,saac_11,pssm_9,pssm_50,pssm_28,pssm_48,pssm_52,pssm_18,pssm_6,pssm_54,pssm_41,pssm_34,pssm_43,pssm_74,pssm_5,pssm_81,pssm_56,pssm_21,saac_42,pssm_68,pssm_2,pssm_96,pssm_20,saac_26,pssm_65,pssm_22,pssm_55,pssm_51,pssm_37,saac_14,saac_43,pssm_7,pssm_88,pssm_53,saac_6,pssm_92,saac_22,pssm_29,pssm_27,saac…
0.872429	0.854644	0.856547	0.40172	one by one-220-seqclass:1-pssm_60,pssm_17,pssm_49,pssm_57,pssm_8,pssm_63,pssm_15,pssm_42,pssm_12,saac_11,pssm_9,pssm_50,pssm_28,pssm_48,pssm_52,pssm_18,pssm_6,pssm_54,pssm_41,pssm_34,pssm_43,pssm_74,pssm_5,pssm_81,pssm_56,pssm_21,saac_42,pssm_68,pssm_2,pssm_96,pssm_20,saac_26,pssm_65,pssm_22,pssm_55,pssm_51,pssm_37,saac_14,saac_43,pssm_7,pssm_88,pssm_53,saac_6,pssm_92,saac_22,pssm_29,pssm_27,saac…
0.884781	0.859422	0.856547	0.410206	one by one-221-seqclass:1-pssm_60,pssm_17,pssm_49,pssm_57,pssm_8,pssm_63,pssm_15,pssm_42,pssm_12,saac_11,pssm_9,pssm_50,pssm_28,pssm_48,pssm_52,pssm_18,pssm_6,pssm_54,pssm_41,pssm_34,pssm_43,pssm_74,pssm_5,pssm_81,pssm_56,pssm_21,saac_42,pssm_68,pssm_2,pssm_96,pssm_20,saac_26,pssm_65,pssm_22,pssm_55,pssm_51,pssm_37,saac_14,saac_43,pssm_7,pssm_88,pssm_53,saac_6,pssm_92,saac_22,pssm_29,pssm_27,saac…
0.881991	0.860432	0.859883	0.412447	one by one-222-seqclass:1-pssm_60,pssm_17,pssm_49,pssm_57,pssm_8,pssm_63,pssm_15,pssm_42,pssm_12,saac_11,pssm_9,pssm_50,pssm_28,pssm_48,pssm_52,pssm_18,pssm_6,pssm_54,pssm_41,pssm_34,pssm_43,pssm_74,pssm_5,pssm_81,pssm_56,pssm_21,saac_42,pssm_68,pssm_2,pssm_96,pssm_20,saac_26,pssm_65,pssm_22,pssm_55,pssm_51,pssm_37,saac_14,saac_43,pssm_7,pssm_88,pssm_53,saac_6,pssm_92,saac_22,pssm_29,pssm_27,saac…
0.872151	0.855221	0.853211	0.400949	one by one-223-seqclass:1-pssm_60,pssm_17,pssm_49,pssm_57,pssm_8,pssm_63,pssm_15,pssm_42,pssm_12,saac_11,pssm_9,pssm_50,pssm_28,pssm_48,pssm_52,pssm_18,pssm_6,pssm_54,pssm_41,pssm_34,pssm_43,pssm_74,pssm_5,pssm_81,pssm_56,pssm_21,saac_42,pssm_68,pssm_2,pssm_96,pssm_20,saac_26,pssm_65,pssm_22,pssm_55,pssm_51,pssm_37,saac_14,saac_43,pssm_7,pssm_88,pssm_53,saac_6,pssm_92,saac_22,pssm_29,pssm_27,saac…
0.89074	0.865569	0.862385	0.421685	one by one-224-seqclass:1-pssm_60,pssm_17,pssm_49,pssm_57,pssm_8,pssm_63,pssm_15,pssm_42,pssm_12,saac_11,pssm_9,pssm_50,pssm_28,pssm_48,pssm_52,pssm_18,pssm_6,pssm_54,pssm_41,pssm_34,pssm_43,pssm_74,pssm_5,pssm_81,pssm_56,pssm_21,saac_42,pssm_68,pssm_2,pssm_96,pssm_20,saac_26,pssm_65,pssm_22,pssm_55,pssm_51,pssm_37,saac_14,saac_43,pssm_7,pssm_88,pssm_53,saac_6,pssm_92,saac_22,pssm_29,pssm_27,saac…
0.89014	0.862317	0.858215	0.415818	one by one-225-seqclass:1-pssm_60,pssm_17,pssm_49,pssm_57,pssm_8,pssm_63,pssm_15,pssm_42,pssm_12,saac_11,pssm_9,pssm_50,pssm_28,pssm_48,pssm_52,pssm_18,pssm_6,pssm_54,pssm_41,pssm_34,pssm_43,pssm_74,pssm_5,pssm_81,pssm_56,pssm_21,saac_42,pssm_68,pssm_2,pssm_96,pssm_20,saac_26,pssm_65,pssm_22,pssm_55,pssm_51,pssm_37,saac_14,saac_43,pssm_7,pssm_88,pssm_53,saac_6,pssm_92,saac_22,pssm_29,pssm_27,saac…
0.885229	0.857473	0.854045	0.407218	one by one-226-seqclass:1-pssm_60,pssm_17,pssm_49,pssm_57,pssm_8,pssm_63,pssm_15,pssm_42,pssm_12,saac_11,pssm_9,pssm_50,pssm_28,pssm_48,pssm_52,pssm_18,pssm_6,pssm_54,pssm_41,pssm_34,pssm_43,pssm_74,pssm_5,pssm_81,pssm_56,pssm_21,saac_42,pssm_68,pssm_2,pssm_96,pssm_20,saac_26,pssm_65,pssm_22,pssm_55,pssm_51,pssm_37,saac_14,saac_43,pssm_7,pssm_88,pssm_53,saac_6,pssm_92,saac_22,pssm_29,pssm_27,saac…
0.886171	0.860075	0.857381	0.411988	one by one-227-seqclass:1-pssm_60,pssm_17,pssm_49,pssm_57,pssm_8,pssm_63,pssm_15,pssm_42,pssm_12,saac_11,pssm_9,pssm_50,pssm_28,pssm_48,pssm_52,pssm_18,pssm_6,pssm_54,pssm_41,pssm_34,pssm_43,pssm_74,pssm_5,pssm_81,pssm_56,pssm_21,saac_42,pssm_68,pssm_2,pssm_96,pssm_20,saac_26,pssm_65,pssm_22,pssm_55,pssm_51,pssm_37,saac_14,saac_43,pssm_7,pssm_88,pssm_53,saac_6,pssm_92,saac_22,pssm_29,pssm_27,saac…
0.862825	0.850083	0.850709	0.391638	one by one-228-seqclass:1-pssm_60,pssm_17,pssm_49,pssm_57,pssm_8,pssm_63,pssm_15,pssm_42,pssm_12,saac_11,pssm_9,pssm_50,pssm_28,pssm_48,pssm_52,pssm_18,pssm_6,pssm_54,pssm_41,pssm_34,pssm_43,pssm_74,pssm_5,pssm_81,pssm_56,pssm_21,saac_42,pssm_68,pssm_2,pssm_96,pssm_20,saac_26,pssm_65,pssm_22,pssm_55,pssm_51,pssm_37,saac_14,saac_43,pssm_7,pssm_88,pssm_53,saac_6,pssm_92,saac_22,pssm_29,pssm_27,saac…
0.888749	0.861664	0.857381	0.41401	one by one-229-seqclass:1-pssm_60,pssm_17,pssm_49,pssm_57,pssm_8,pssm_63,pssm_15,pssm_42,pssm_12,saac_11,pssm_9,pssm_50,pssm_28,pssm_48,pssm_52,pssm_18,pssm_6,pssm_54,pssm_41,pssm_34,pssm_43,pssm_74,pssm_5,pssm_81,pssm_56,pssm_21,saac_42,pssm_68,pssm_2,pssm_96,pssm_20,saac_26,pssm_65,pssm_22,pssm_55,pssm_51,pssm_37,saac_14,saac_43,pssm_7,pssm_88,pssm_53,saac_6,pssm_92,saac_22,pssm_29,pssm_27,saac…
0.877316	0.856238	0.856547	0.404969	one by one-230-seqclass:1-pssm_60,pssm_17,pssm_49,pssm_57,pssm_8,pssm_63,pssm_15,pssm_42,pssm_12,saac_11,pssm_9,pssm_50,pssm_28,pssm_48,pssm_52,pssm_18,pssm_6,pssm_54,pssm_41,pssm_34,pssm_43,pssm_74,pssm_5,pssm_81,pssm_56,pssm_21,saac_42,pssm_68,pssm_2,pssm_96,pssm_20,saac_26,pssm_65,pssm_22,pssm_55,pssm_51,pssm_37,saac_14,saac_43,pssm_7,pssm_88,pssm_53,saac_6,pssm_92,saac_22,pssm_29,pssm_27,saac…
0.877986	0.849372	0.845705	0.392591	one by one-231-seqclass:1-pssm_60,pssm_17,pssm_49,pssm_57,pssm_8,pssm_63,pssm_15,pssm_42,pssm_12,saac_11,pssm_9,pssm_50,pssm_28,pssm_48,pssm_52,pssm_18,pssm_6,pssm_54,pssm_41,pssm_34,pssm_43,pssm_74,pssm_5,pssm_81,pssm_56,pssm_21,saac_42,pssm_68,pssm_2,pssm_96,pssm_20,saac_26,pssm_65,pssm_22,pssm_55,pssm_51,pssm_37,saac_14,saac_43,pssm_7,pssm_88,pssm_53,saac_6,pssm_92,saac_22,pssm_29,pssm_27,saac…
0.876609	0.854287	0.854045	0.401401	one by one-232-seqclass:1-pssm_60,pssm_17,pssm_49,pssm_57,pssm_8,pssm_63,pssm_15,pssm_42,pssm_12,saac_11,pssm_9,pssm_50,pssm_28,pssm_48,pssm_52,pssm_18,pssm_6,pssm_54,pssm_41,pssm_34,pssm_43,pssm_74,pssm_5,pssm_81,pssm_56,pssm_21,saac_42,pssm_68,pssm_2,pssm_96,pssm_20,saac_26,pssm_65,pssm_22,pssm_55,pssm_51,pssm_37,saac_14,saac_43,pssm_7,pssm_88,pssm_53,saac_6,pssm_92,saac_22,pssm_29,pssm_27,saac…
0.889456	0.863615	0.859883	0.417655	one by one-233-seqclass:1-pssm_60,pssm_17,pssm_49,pssm_57,pssm_8,pssm_63,pssm_15,pssm_42,pssm_12,saac_11,pssm_9,pssm_50,pssm_28,pssm_48,pssm_52,pssm_18,pssm_6,pssm_54,pssm_41,pssm_34,pssm_43,pssm_74,pssm_5,pssm_81,pssm_56,pssm_21,saac_42,pssm_68,pssm_2,pssm_96,pssm_20,saac_26,pssm_65,pssm_22,pssm_55,pssm_51,pssm_37,saac_14,saac_43,pssm_7,pssm_88,pssm_53,saac_6,pssm_92,saac_22,pssm_29,pssm_27,saac…
0.868207	0.856229	0.856547	0.40244	one by one-234-seqclass:1-pssm_60,pssm_17,pssm_49,pssm_57,pssm_8,pssm_63,pssm_15,pssm_42,pssm_12,saac_11,pssm_9,pssm_50,pssm_28,pssm_48,pssm_52,pssm_18,pssm_6,pssm_54,pssm_41,pssm_34,pssm_43,pssm_74,pssm_5,pssm_81,pssm_56,pssm_21,saac_42,pssm_68,pssm_2,pssm_96,pssm_20,saac_26,pssm_65,pssm_22,pssm_55,pssm_51,pssm_37,saac_14,saac_43,pssm_7,pssm_88,pssm_53,saac_6,pssm_92,saac_22,pssm_29,pssm_27,saac…
0.876268	0.854936	0.854879	0.40228	one by one-235-seqclass:1-pssm_60,pssm_17,pssm_49,pssm_57,pssm_8,pssm_63,pssm_15,pssm_42,pssm_12,saac_11,pssm_9,pssm_50,pssm_28,pssm_48,pssm_52,pssm_18,pssm_6,pssm_54,pssm_41,pssm_34,pssm_43,pssm_74,pssm_5,pssm_81,pssm_56,pssm_21,saac_42,pssm_68,pssm_2,pssm_96,pssm_20,saac_26,pssm_65,pssm_22,pssm_55,pssm_51,pssm_37,saac_14,saac_43,pssm_7,pssm_88,pssm_53,saac_6,pssm_92,saac_22,pssm_29,pssm_27,saac…
0.866899	0.851025	0.849875	0.393425	one by one-236-seqclass:1-pssm_60,pssm_17,pssm_49,pssm_57,pssm_8,pssm_63,pssm_15,pssm_42,pssm_12,saac_11,pssm_9,pssm_50,pssm_28,pssm_48,pssm_52,pssm_18,pssm_6,pssm_54,pssm_41,pssm_34,pssm_43,pssm_74,pssm_5,pssm_81,pssm_56,pssm_21,saac_42,pssm_68,pssm_2,pssm_96,pssm_20,saac_26,pssm_65,pssm_22,pssm_55,pssm_51,pssm_37,saac_14,saac_43,pssm_7,pssm_88,pssm_53,saac_6,pssm_92,saac_22,pssm_29,pssm_27,saac…
0.881284	0.858481	0.857381	0.408795	one by one-237-seqclass:1-pssm_60,pssm_17,pssm_49,pssm_57,pssm_8,pssm_63,pssm_15,pssm_42,pssm_12,saac_11,pssm_9,pssm_50,pssm_28,pssm_48,pssm_52,pssm_18,pssm_6,pssm_54,pssm_41,pssm_34,pssm_43,pssm_74,pssm_5,pssm_81,pssm_56,pssm_21,saac_42,pssm_68,pssm_2,pssm_96,pssm_20,saac_26,pssm_65,pssm_22,pssm_55,pssm_51,pssm_37,saac_14,saac_43,pssm_7,pssm_88,pssm_53,saac_6,pssm_92,saac_22,pssm_29,pssm_27,saac…
0.887373	0.866579	0.865721	0.423839	one by one-238-seqclass:1-pssm_60,pssm_17,pssm_49,pssm_57,pssm_8,pssm_63,pssm_15,pssm_42,pssm_12,saac_11,pssm_9,pssm_50,pssm_28,pssm_48,pssm_52,pssm_18,pssm_6,pssm_54,pssm_41,pssm_34,pssm_43,pssm_74,pssm_5,pssm_81,pssm_56,pssm_21,saac_42,pssm_68,pssm_2,pssm_96,pssm_20,saac_26,pssm_65,pssm_22,pssm_55,pssm_51,pssm_37,saac_14,saac_43,pssm_7,pssm_88,pssm_53,saac_6,pssm_92,saac_22,pssm_29,pssm_27,saac…
0.88152	0.859131	0.858215	0.410005	one by one-239-seqclass:1-pssm_60,pssm_17,pssm_49,pssm_57,pssm_8,pssm_63,pssm_15,pssm_42,pssm_12,saac_11,pssm_9,pssm_50,pssm_28,pssm_48,pssm_52,pssm_18,pssm_6,pssm_54,pssm_41,pssm_34,pssm_43,pssm_74,pssm_5,pssm_81,pssm_56,pssm_21,saac_42,pssm_68,pssm_2,pssm_96,pssm_20,saac_26,pssm_65,pssm_22,pssm_55,pssm_51,pssm_37,saac_14,saac_43,pssm_7,pssm_88,pssm_53,saac_6,pssm_92,saac_22,pssm_29,pssm_27,saac…
0.884545	0.858771	0.855713	0.409012	one by one-240-seqclass:1-pssm_60,pssm_17,pssm_49,pssm_57,pssm_8,pssm_63,pssm_15,pssm_42,pssm_12,saac_11,pssm_9,pssm_50,pssm_28,pssm_48,pssm_52,pssm_18,pssm_6,pssm_54,pssm_41,pssm_34,pssm_43,pssm_74,pssm_5,pssm_81,pssm_56,pssm_21,saac_42,pssm_68,pssm_2,pssm_96,pssm_20,saac_26,pssm_65,pssm_22,pssm_55,pssm_51,pssm_37,saac_14,saac_43,pssm_7,pssm_88,pssm_53,saac_6,pssm_92,saac_22,pssm_29,pssm_27,saac…
0.877787	0.857539	0.858215	0.407383	one by one-241-seqclass:1-pssm_60,pssm_17,pssm_49,pssm_57,pssm_8,pssm_63,pssm_15,pssm_42,pssm_12,saac_11,pssm_9,pssm_50,pssm_28,pssm_48,pssm_52,pssm_18,pssm_6,pssm_54,pssm_41,pssm_34,pssm_43,pssm_74,pssm_5,pssm_81,pssm_56,pssm_21,saac_42,pssm_68,pssm_2,pssm_96,pssm_20,saac_26,pssm_65,pssm_22,pssm_55,pssm_51,pssm_37,saac_14,saac_43,pssm_7,pssm_88,pssm_53,saac_6,pssm_92,saac_22,pssm_29,pssm_27,saac…
0.872429	0.854644	0.856547	0.40172	one by one-242-seqclass:1-pssm_60,pssm_17,pssm_49,pssm_57,pssm_8,pssm_63,pssm_15,pssm_42,pssm_12,saac_11,pssm_9,pssm_50,pssm_28,pssm_48,pssm_52,pssm_18,pssm_6,pssm_54,pssm_41,pssm_34,pssm_43,pssm_74,pssm_5,pssm_81,pssm_56,pssm_21,saac_42,pssm_68,pssm_2,pssm_96,pssm_20,saac_26,pssm_65,pssm_22,pssm_55,pssm_51,pssm_37,saac_14,saac_43,pssm_7,pssm_88,pssm_53,saac_6,pssm_92,saac_22,pssm_29,pssm_27,saac…
0.873348	0.853996	0.855713	0.401137	one by one-243-seqclass:1-pssm_60,pssm_17,pssm_49,pssm_57,pssm_8,pssm_63,pssm_15,pssm_42,pssm_12,saac_11,pssm_9,pssm_50,pssm_28,pssm_48,pssm_52,pssm_18,pssm_6,pssm_54,pssm_41,pssm_34,pssm_43,pssm_74,pssm_5,pssm_81,pssm_56,pssm_21,saac_42,pssm_68,pssm_2,pssm_96,pssm_20,saac_26,pssm_65,pssm_22,pssm_55,pssm_51,pssm_37,saac_14,saac_43,pssm_7,pssm_88,pssm_53,saac_6,pssm_92,saac_22,pssm_29,pssm_27,saac…
0.876609	0.854287	0.854045	0.401401	one by one-244-seqclass:1-pssm_60,pssm_17,pssm_49,pssm_57,pssm_8,pssm_63,pssm_15,pssm_42,pssm_12,saac_11,pssm_9,pssm_50,pssm_28,pssm_48,pssm_52,pssm_18,pssm_6,pssm_54,pssm_41,pssm_34,pssm_43,pssm_74,pssm_5,pssm_81,pssm_56,pssm_21,saac_42,pssm_68,pssm_2,pssm_96,pssm_20,saac_26,pssm_65,pssm_22,pssm_55,pssm_51,pssm_37,saac_14,saac_43,pssm_7,pssm_88,pssm_53,saac_6,pssm_92,saac_22,pssm_29,pssm_27,saac…
0.871015	0.85074	0.851543	0.394656	one by one-245-seqclass:1-pssm_60,pssm_17,pssm_49,pssm_57,pssm_8,pssm_63,pssm_15,pssm_42,pssm_12,saac_11,pssm_9,pssm_50,pssm_28,pssm_48,pssm_52,pssm_18,pssm_6,pssm_54,pssm_41,pssm_34,pssm_43,pssm_74,pssm_5,pssm_81,pssm_56,pssm_21,saac_42,pssm_68,pssm_2,pssm_96,pssm_20,saac_26,pssm_65,pssm_22,pssm_55,pssm_51,pssm_37,saac_14,saac_43,pssm_7,pssm_88,pssm_53,saac_6,pssm_92,saac_22,pssm_29,pssm_27,saac…
0.86786	0.84915	0.851543	0.392326	one by one-246-seqclass:1-pssm_60,pssm_17,pssm_49,pssm_57,pssm_8,pssm_63,pssm_15,pssm_42,pssm_12,saac_11,pssm_9,pssm_50,pssm_28,pssm_48,pssm_52,pssm_18,pssm_6,pssm_54,pssm_41,pssm_34,pssm_43,pssm_74,pssm_5,pssm_81,pssm_56,pssm_21,saac_42,pssm_68,pssm_2,pssm_96,pssm_20,saac_26,pssm_65,pssm_22,pssm_55,pssm_51,pssm_37,saac_14,saac_43,pssm_7,pssm_88,pssm_53,saac_6,pssm_92,saac_22,pssm_29,pssm_27,saac…
0.867842	0.853628	0.853211	0.398034	one by one-247-seqclass:1-pssm_60,pssm_17,pssm_49,pssm_57,pssm_8,pssm_63,pssm_15,pssm_42,pssm_12,saac_11,pssm_9,pssm_50,pssm_28,pssm_48,pssm_52,pssm_18,pssm_6,pssm_54,pssm_41,pssm_34,pssm_43,pssm_74,pssm_5,pssm_81,pssm_56,pssm_21,saac_42,pssm_68,pssm_2,pssm_96,pssm_20,saac_26,pssm_65,pssm_22,pssm_55,pssm_51,pssm_37,saac_14,saac_43,pssm_7,pssm_88,pssm_53,saac_6,pssm_92,saac_22,pssm_29,pssm_27,saac…
0.880577	0.856529	0.854879	0.405209	one by one-248-seqclass:1-pssm_60,pssm_17,pssm_49,pssm_57,pssm_8,pssm_63,pssm_15,pssm_42,pssm_12,saac_11,pssm_9,pssm_50,pssm_28,pssm_48,pssm_52,pssm_18,pssm_6,pssm_54,pssm_41,pssm_34,pssm_43,pssm_74,pssm_5,pssm_81,pssm_56,pssm_21,saac_42,pssm_68,pssm_2,pssm_96,pssm_20,saac_26,pssm_65,pssm_22,pssm_55,pssm_51,pssm_37,saac_14,saac_43,pssm_7,pssm_88,pssm_53,saac_6,pssm_92,saac_22,pssm_29,pssm_27,saac…
0.885252	0.860723	0.858215	0.412616	one by one-249-seqclass:1-pssm_60,pssm_17,pssm_49,pssm_57,pssm_8,pssm_63,pssm_15,pssm_42,pssm_12,saac_11,pssm_9,pssm_50,pssm_28,pssm_48,pssm_52,pssm_18,pssm_6,pssm_54,pssm_41,pssm_34,pssm_43,pssm_74,pssm_5,pssm_81,pssm_56,pssm_21,saac_42,pssm_68,pssm_2,pssm_96,pssm_20,saac_26,pssm_65,pssm_22,pssm_55,pssm_51,pssm_37,saac_14,saac_43,pssm_7,pssm_88,pssm_53,saac_6,pssm_92,saac_22,pssm_29,pssm_27,saac…
0.889904	0.861667	0.857381	0.414609	one by one-250-seqclass:1-pssm_60,pssm_17,pssm_49,pssm_57,pssm_8,pssm_63,pssm_15,pssm_42,pssm_12,saac_11,pssm_9,pssm_50,pssm_28,pssm_48,pssm_52,pssm_18,pssm_6,pssm_54,pssm_41,pssm_34,pssm_43,pssm_74,pssm_5,pssm_81,pssm_56,pssm_21,saac_42,pssm_68,pssm_2,pssm_96,pssm_20,saac_26,pssm_65,pssm_22,pssm_55,pssm_51,pssm_37,saac_14,saac_43,pssm_7,pssm_88,pssm_53,saac_6,pssm_92,saac_22,pssm_29,pssm_27,saac…
0.872771	0.853995	0.855713	0.400842	one by one-251-seqclass:1-pssm_60,pssm_17,pssm_49,pssm_57,pssm_8,pssm_63,pssm_15,pssm_42,pssm_12,saac_11,pssm_9,pssm_50,pssm_28,pssm_48,pssm_52,pssm_18,pssm_6,pssm_54,pssm_41,pssm_34,pssm_43,pssm_74,pssm_5,pssm_81,pssm_56,pssm_21,saac_42,pssm_68,pssm_2,pssm_96,pssm_20,saac_26,pssm_65,pssm_22,pssm_55,pssm_51,pssm_37,saac_14,saac_43,pssm_7,pssm_88,pssm_53,saac_6,pssm_92,saac_22,pssm_29,pssm_27,saac…
0.876268	0.854936	0.854879	0.40228	one by one-252-seqclass:1-pssm_60,pssm_17,pssm_49,pssm_57,pssm_8,pssm_63,pssm_15,pssm_42,pssm_12,saac_11,pssm_9,pssm_50,pssm_28,pssm_48,pssm_52,pssm_18,pssm_6,pssm_54,pssm_41,pssm_34,pssm_43,pssm_74,pssm_5,pssm_81,pssm_56,pssm_21,saac_42,pssm_68,pssm_2,pssm_96,pssm_20,saac_26,pssm_65,pssm_22,pssm_55,pssm_51,pssm_37,saac_14,saac_43,pssm_7,pssm_88,pssm_53,saac_6,pssm_92,saac_22,pssm_29,pssm_27,saac…
0.881414	0.860431	0.859883	0.412129	one by one-253-seqclass:1-pssm_60,pssm_17,pssm_49,pssm_57,pssm_8,pssm_63,pssm_15,pssm_42,pssm_12,saac_11,pssm_9,pssm_50,pssm_28,pssm_48,pssm_52,pssm_18,pssm_6,pssm_54,pssm_41,pssm_34,pssm_43,pssm_74,pssm_5,pssm_81,pssm_56,pssm_21,saac_42,pssm_68,pssm_2,pssm_96,pssm_20,saac_26,pssm_65,pssm_22,pssm_55,pssm_51,pssm_37,saac_14,saac_43,pssm_7,pssm_88,pssm_53,saac_6,pssm_92,saac_22,pssm_29,pssm_27,saac…
0.881756	0.859782	0.859049	0.411222	one by one-254-seqclass:1-pssm_60,pssm_17,pssm_49,pssm_57,pssm_8,pssm_63,pssm_15,pssm_42,pssm_12,saac_11,pssm_9,pssm_50,pssm_28,pssm_48,pssm_52,pssm_18,pssm_6,pssm_54,pssm_41,pssm_34,pssm_43,pssm_74,pssm_5,pssm_81,pssm_56,pssm_21,saac_42,pssm_68,pssm_2,pssm_96,pssm_20,saac_26,pssm_65,pssm_22,pssm_55,pssm_51,pssm_37,saac_14,saac_43,pssm_7,pssm_88,pssm_53,saac_6,pssm_92,saac_22,pssm_29,pssm_27,saac…
0.8675	0.854277	0.854045	0.398893	one by one-255-seqclass:1-pssm_60,pssm_17,pssm_49,pssm_57,pssm_8,pssm_63,pssm_15,pssm_42,pssm_12,saac_11,pssm_9,pssm_50,pssm_28,pssm_48,pssm_52,pssm_18,pssm_6,pssm_54,pssm_41,pssm_34,pssm_43,pssm_74,pssm_5,pssm_81,pssm_56,pssm_21,saac_42,pssm_68,pssm_2,pssm_96,pssm_20,saac_26,pssm_65,pssm_22,pssm_55,pssm_51,pssm_37,saac_14,saac_43,pssm_7,pssm_88,pssm_53,saac_6,pssm_92,saac_22,pssm_29,pssm_27,saac…
0.876503	0.855586	0.855713	0.403469	one by one-256-seqclass:1-pssm_60,pssm_17,pssm_49,pssm_57,pssm_8,pssm_63,pssm_15,pssm_42,pssm_12,saac_11,pssm_9,pssm_50,pssm_28,pssm_48,pssm_52,pssm_18,pssm_6,pssm_54,pssm_41,pssm_34,pssm_43,pssm_74,pssm_5,pssm_81,pssm_56,pssm_21,saac_42,pssm_68,pssm_2,pssm_96,pssm_20,saac_26,pssm_65,pssm_22,pssm_55,pssm_51,pssm_37,saac_14,saac_43,pssm_7,pssm_88,pssm_53,saac_6,pssm_92,saac_22,pssm_29,pssm_27,saac…
